# Supplementary material
Source: publisher figshare collection journal article supplement (https://geolsoc.figshare.com/ndownloader/files/14229518)
Supplement: Supplementary file 1 [file 14229518]

## Sheet: Table S2
Table S2. Individual U-Pb ages for all unknown and standard zircon analyses
	Isotope ratios and 1σ error (absolute)								Calculated age in Ma and 2σ error (absolute)						Total Isotope counts (PPM) and 2σ error (absolute)
Analysis	207Pb/206Pb		206Pb/238U		207Pb/235U		ρ*	Concordance (%)	207Pb/206Pb		206Pb/238U		207Pb/235U		U		Th		Pb
Z16-52 - 19	0.0839	0.0018	0.1545	0.0014	1.805	0.0415	0.044092	72.2309	1282	80	926	16	1209	31	2956	73	27.46	0.64	374	41
Z16-52 - 11	0.08655	0.00049	0.148	0.00115	1.78	0.017	0.4422	65.96	1349	22	889.8	13	1258	17	3578	74	45.9	2	718	46
Z16-52 - 27	0.0849	0.00085	0.1433	0.00225	1.682	0.02	0.79602	65.8276	1311	40	863	25	1472	53	3220	400	49.8	5	1227	56
Z16-52 - 1	0.1016	0.00175	0.1625	0.0013	2.292	0.05	0.92302	58.8364	1650	63	970.8	14	1574.4	15	3600	190	40.1	3.3	1486	50
Z16-52 - 16	0.1035	0.00105	0.1649	0.00215	2.35	0.022	0.7739	58.363	1686	37	984	24	1006	42	17170	520	1990	190	3810	170
Z16-52 - 6	0.0998	0.00155	0.1434	0.0015	1.983	0.023	-0.72017	53.4323	1617	59	864	17	1110	16	2769	69	29.8	1.1	306	29
Z16-52 - 8	0.102	0.00175	0.1462	0.00185	1.68	0.21	0.99129	53.0477	1657	64	879	21	1840	21	2740	280	28.3	3.2	1880	190
Z16-52 - 17	0.0837	0.00095	0.1045	0.0023	1.211	0.023	0.8894	49.961	1283	44	641	27	1137	26	4100	2400	82	37	287	81
Z16-52 - 2	0.131	0.0013	0.13503	0.001	2.452	0.0285	0.39634	38.6967	2110	35	816.5	11	-2.26	0.13	1920	140	25.5	2.4	-0.810484	4.1e-05
Z16-52 - 15	0.147	0.0018	0.1398	0.0027	2.875	0.047	0.81396	36.8558	2309	43	851	27	1476	26	3240	530	49.9	8.5	1200	190
Z16-52 - 4	0.1822	0.00105	0.1472	0.0011	3.714	0.0345	0.16119	33.1213	2672	19	885	12	1038.1	12	5050	160	46.8	2	272.2	5.2
Z16-52 - 14	0.199	0.0028	0.1444	0.0011	3.99	0.075	0.42687	30.8842	2816	45	869.7	13	2415	24	3790	130	151	17	5930	170
Z16-52 - 20	0.294	0.0065	0.175	0.005	7.07	0.105	0.583	30.1892	3435	69	1037	57	1238	19	3810	300	30.7	4.1	909	99
Z16-52 - 13	0.1522	0.00395	0.114	0.0024	2.385	0.032	-0.2736	29.4741	2358	92	695	28	1630	30	1750	190	43	12	798	51
Z16-52 - 21	0.1594	0.00305	0.115	0.00225	2.55	0.095	0.96972	28.6708	2445	61	701	26	1375	25	3050	290	36.4	3.5	848	51
Z16-52 - 7	0.2452	0.00375	0.1494	0.0026	5.123	0.065	-0.15469	28.3144	3168	56	897	29	1227.6	13	2840	170	33	5.1	381	28
Z16-52 - 24	0.4457	0.0046	0.1946	0.0014	11.95	0.14	-0.54506	28.174	4069	31	1146.4	15	805	21	4520	420	189	25	232	29
Z16-52 - 10	0.193	0.0075	0.124	0.0055	3.28	0.055	0.45578	27.3818	2750	130	753	62	1876	77	2300	400	108	35	1840	480
Z16-52 - 18	0.282	0.0195	0.142	0.00395	5.41	0.23	-0.87731	25.8308	3310	220	855	45	1046	29	5300	130	28	3	297	70
Z16-52 - 12	0.4406	0.0024	0.1603	0.002	9.79	0.125	0.94255	23.6609	4053.1	16	959	22	2120	26	5260	230	40.6	3.7	5020	340
Z16-52 - 3	0.214	0.00135	0.1104	0.00415	3.27	0.11	0.9994	22.9642	2935	20	674	48	1282	50	3520	520	97	30	1150	240
Z16-52 - 25	0.3919	0.00455	0.1111	0.0028	5.91	0.075	0.56917	17.5135	3877	35	679	32	1608	40	3080	240	55.5	5.7	1850	190
Z16-52 - 29	0.5077	0.0045	0.11159	0.00085	7.85	0.085	0.44091	15.9958	4263	26	681.9	10	1209.6	15	5960	140	68.1	8.5	1763	34
Z16-52 - 26	0.2397	0.0043	0.0751	0.0031	2.51	0.07	0.91552	14.992	3115	55	467	37	2600	22	2610	240	57.2	7.8	4620	370
Z16-52 - 22	0.3651	0.00275	0.077	0.00145	3.88	0.095	0.96561	12.679	3770	23	478	17	1962	22	4944	97	157	11	4100	110
Z16-52 - 23	0.2689	0.00485	0.0616	0.00125	2.291	0.0245	0.43329	11.6737	3298	56	385	15	1274	39	5350	320	47.2	2.5	1714	52
Z16-52 - 5	0.26621	0.0014	0.0459	0.0014	1.7	0.055	0.97926	8.80266	3283.1	16	289	17	1002	15	3160	110	54.4	4	161	20
Z16-52 - 28	0.4074	0.00345	0.0495	0.0012	2.85	0.09	0.98371	7.90142	3936	25	311	14	1366	45	10260	180	126	12	4210	120
Z16-50 - 59**	0.05713	0.00035	0.07976	0.00055	0.631	0.0055	0.60329	99.9394	495	27	494.7	6.5	485.1	11	2740	130	1170	280	225	55
Z16-50 - 60	0.05743	0.000365	0.07985	0.0006	0.6337	0.006	0.71241	97.6726	507	28	495.2	7.2	491.1	6.8	459	17	166.1	9.9	36.9	1.4
Z16-50 - 58	0.05756	0.000345	0.08062	0.00055	0.644	0.0055	0.50163	97.6172	512	26	499.8	6.7	562.8	8.2	2081	89	2620	190	548	40
Z16-50 - 14**	0.05809	0.000345	0.08093	0.0006	0.6532	0.0065	0.87148	94.3045	532	26	501.7	7	523	11	860	130	990	210	129	19
Z16-50 - 49	0.05896	0.00039	0.08378	0.0006	0.6812	0.0065	0.39666	91.9681	564	29	518.7	7.2	480.3	8.1	775	37	1094	43	244.5	5.8
Z16-50 - 52	0.0584	0.000355	0.08036	0.00065	0.6512	0.0065	0.74025	91.5809	544	27	498.2	8	541	15	1096	41	324	6.1	80.7	5.6
Z16-50 - 9	0.05909	0.00049	0.082	0.00055	0.674	0.0075	0.53048	89.4366	568	36	508	6.8	522	18	626	25	774	24	166.8	2.1
Z16-50 - 6	0.05798	0.00041	0.07537	0.0006	0.6049	0.0065	0.75969	88.7121	528	31	468.4	7.4	506	27	599	65	830	130	169	19
Z16-50 - 2	0.0586	0.000395	0.07647	0.00055	0.622	0.0055	0.71298	86.2069	551	29	475	6.8	522.8	9.1	862	56	259.8	9.8	68	5.7
Z16-50 - 15	0.0588	0.00035	0.07678	0.00055	0.6261	0.0055	0.80929	85.4659	558	26	476.9	6.6	836	22	830	31	347.5	7.9	183.9	9.7
Z16-50 - 36	0.05884	0.00038	0.07706	0.00055	0.6319	0.006	0.72332	85.4643	560	28	478.6	6.6	505.2	6.8	861	58	525	48	126	11
Z16-50 - 48	0.05955	0.00046	0.0788	0.0008	0.6504	0.0065	0.78789	83.5897	585	34	489	9.7	534.8	8.9	709	79	2196	87	91.3	7.1
Z16-50 - 33	0.05959	0.000415	0.0759	0.0008	0.628	0.0085	0.8879	80.3407	587	30	471.6	9.5	522	21	547	25	548	36	131.4	3.1
Z16-50 - 45	0.05972	0.00055	0.07428	0.000485	0.619	0.0075	0.21484	78.1557	591	41	461.9	5.9	510.4	7.9	1287	44	727	23	173	11
Z16-50 - 32	0.06036	0.000345	0.07611	0.00055	0.6385	0.0055	0.7151	76.878	615	25	472.8	6.7	493.7	6.8	791	31	242	13	51.5	4.6
Z16-50 - 19	0.05936	0.00049	0.0705	0.0016	0.583	0.0105	0.97514	75.9516	578	36	439	20	687	31	1479	72	8800	2200	329	37
Z16-50 - 47	0.061	0.0006	0.07645	0.0006	0.647	0.008	0.22702	74.6698	636	42	474.9	7	646.8	10	1725	48	590	110	312	15
Z16-50 - 13	0.062	0.0018	0.07833	0.00065	0.673	0.0175	-0.22837	73.6515	660	110	486.1	8	479	12	549	25	212	6.7	49.2	1.5
Z16-50 - 46	0.0604	0.00095	0.0745	0.002	0.628	0.009	0.90525	73.0284	634	75	463	24	466	14	723	61	263.6	7.8	51	1.3
Z16-50 - 21	0.06146	0.00055	0.0764	0.001	0.6573	0.0055	0.61996	72.4771	654	40	474	12	762	18	1561	93	7490	120	700	16
Z16-50 - 12	0.06261	0.00038	0.0797	0.0008	0.6935	0.0075	0.86419	71.196	694	26	494.1	9.8	512.9	6.9	3357	78	3886	73	839	28
Z16-50 - 1	0.0611	0.000425	0.0723	0.0009	0.613	0.0085	0.89313	69.5209	647	27	449.8	11	709	13	992	56	2360	500	200	26
Z16-50 - 30	0.06082	0.00039	0.07028	0.00055	0.5929	0.0065	0.79713	69.3819	631	28	437.8	6.7	659	35	1108	70	5700	2300	333	54
Z16-50 - 62	0.06252	0.000455	0.0757	0.00075	0.6587	0.0065	0.72299	68.1884	690	31	470.5	8.7	630	13	1365	25	2320	210	424	51
Z16-50 - 11	0.0624	0.000375	0.0743	0.0005	0.6447	0.0055	0.89247	67.2489	687	26	462	6.1	521	17	380	35	372	72	88	13
Z16-50 - 34	0.0641	0.00145	0.07753	0.00065	0.687	0.0155	0.50532	65.5858	734	87	481.4	7.5	470.6	8.3	638	35	377	18	88.3	2.3
Z16-50 - 7	0.0639	0.0012	0.07582	0.00055	0.673	0.015	0.75141	64.446	731	78	471.1	6.6	394.9	8.8	123.6	2.1	50.6	1.7	10.33	0.16
Z16-50 - 3	0.0655	0.0012	0.07739	0.0006	0.704	0.0125	-0.21431	61.1323	786	77	480.5	7.1	524	12	2630	270	3450	250	373	35
Z16-50 - 26	0.06294	0.000435	0.0676	0.00085	0.5898	0.0065	0.92904	59.858	704	30	421.4	10	404.1	6.9	553	12	456	11	62.5	1.5
Z16-50 - 18	0.06333	0.000445	0.0686	0.0008	0.602	0.0095	0.77751	59.5404	718	30	427.5	9.5	472.6	8	494	40	404	17	52.3	1.8
Z16-50 - 28	0.0654	0.00055	0.0744	0.0009	0.675	0.01	0.61803	58.8295	786	35	462.4	11	535	22	995	33	462	18	122.9	7.3
Z16-50 - 39	0.0676	0.0011	0.0795	0.00065	0.74	0.0105	-0.40613	58.1486	848	67	493.1	7.5	501.4	7	898	34	272	47	43.9	7.3
Z16-50 - 56	0.0659	0.0009	0.07179	0.0006	0.657	0.0105	0.35893	55.8625	800	57	446.9	7.3	494.9	11	462	18	378	21	52.2	1.4
Z16-50 - 8	0.0662	0.00205	0.07015	0.00055	0.63	0.015	0.60595	54.6375	800	120	437.1	6.9	530	18	594	12	246.8	4.4	67.9	4
Z16-50 - 44	0.0679	0.0009	0.0746	0.0008	0.6994	0.006	-0.056903	53.9697	859	57	463.6	9.6	635.9	10	1582	51	1542	44	267.6	8.3
Z16-50 - 25	0.0692	0.0021	0.07	0.00085	0.671	0.0145	-0.48115	49.5455	880	130	436	10	497.3	7.4	772	21	316	14	59.7	4.3
Z16-50 - 51	0.06953	0.00047	0.07252	0.00055	0.6988	0.006	0.15723	49.4304	913	28	451.3	6.8	513.5	7.6	1143	87	356	12	110.6	3.3
Z16-50 - 24	0.0748	0.00115	0.08275	0.00065	0.859	0.012	-0.52351	48.4405	1058	63	512.5	7.9	533	27	1540	160	8700	2600	176	37
Z16-50 - 29	0.06415	0.00046	0.05468	0.00043	0.4889	0.005	0.37824	46.0671	745	31	343.2	5.2	562	12	798	54	1130	200	236	32
Z16-50 - 37	0.0702	0.00095	0.0677	0.0008	0.6583	0.006	-0.53648	45.4252	929	57	422	9.6	624.5	12	622	30	255	16	100.6	4.8
Z16-50 - 53	0.08	0.00225	0.0817	0.00085	0.907	0.0315	0.69591	42.5378	1190	100	506.2	9.9	623	13	1663	37	6700	1400	510	61
Z16-50 - 4	0.0754	0.00265	0.0711	0.00245	0.7407	0.007	-0.11268	40.9259	1080	140	442	29	567	22	565	31	1173	95	81.8	5.3
Z16-50 - 27	0.0659	0.00085	0.0519	0.00065	0.476	0.0065	0.56451	40.8385	799	53	326.3	7.8	703	17	2330	68	5720	510	495	5.5
Z16-50 - 55	0.0802	0.0015	0.0764	0.00085	0.852	0.011	-0.8453	39.0939	1214	77	474.6	9.9	538.4	7.5	1000	51	760	250	123	27
Z16-50 - 5	0.0754	0.00215	0.0654	0.0015	0.674	0.0095	-0.28307	38.5849	1060	110	409	18	489.1	9.2	506	10	307	20	69.1	3.6
Z16-50 - 41	0.086	0.0026	0.0727	0.0009	0.847	0.0115	-0.50357	34	1330	110	452.2	11	494.4	11	1230	80	1250	180	254	27
Z16-50 - 40	0.0863	0.0014	0.0702	0.00075	0.85	0.0105	-0.022279	32.2969	1354	58	437.3	8.8	506.3	9.8	1011	26	586	32	144	11
Z16-50 - 35	0.08812	0.00065	0.07143	0.00055	0.871	0.0095	0.67142	32.1387	1384	27	444.8	6.6	508.7	8	1070	22	431	41	103.1	8.6
Z16-50 - 54	0.112	0.005	0.08185	0.00065	1.26	0.055	-0.3069	28.4888	1780	190	507.1	7.7	527.5	7.6	377	23	337	12	55	1.9
Z16-50 - 42	0.0878	0.0019	0.06063	0.00046	0.741	0.0175	0.45297	27.3415	1388	88	379.5	5.6	670.7	12	1540	100	1410	160	245.8	9.3
Z16-50 - 10	0.1143	0.00155	0.0805	0.00075	1.28	0.025	0.85241	26.7417	1866	49	499	9.2	538.1	7.1	941	57	1165	41	131.7	4.6
Z16-50 - 61	0.1029	0.00295	0.07157	0.00065	1.029	0.036	0.72099	26.6826	1670	110	445.6	7.8	509.2	7.8	2650	45	2310	130	562	14
Z16-50 - 43	0.1051	0.0017	0.06846	0.000485	0.998	0.0165	-0.3273	24.9008	1714	60	426.8	5.9	654	33	900	120	1370	170	310.4	7.1
Z16-50 - 31	0.0899	0.0022	0.05584	0.0005	0.695	0.0185	0.36915	24.8088	1412	94	350.3	6.1	838	49	924	29	1457	55	318	16
Z16-50 - 23	0.111	0.0075	0.0635	0.00225	0.918	0.033	-0.85443	23.2164	1710	260	397	27	625.4	12	968	45	1291	43	197.7	7.4
Z16-50 - 50	0.1074	0.00135	0.0636	0.0006	0.936	0.011	0.32106	22.6625	1754	46	397.5	7	512	13	993	29	489	80	88	11
Z16-50 - 38	0.107	0.0075	0.0505	0.0024	0.68	0.019	-0.33226	19.3293	1640	250	317	29	643	17	2070	120	423	39	271	16
Z16-50 - 22	0.1213	0.00435	0.0603	0.00165	1.011	0.013	-0.72908	19.0404	1980	130	377	20	504.8	6.6	777	66	236	18	60.8	4
Z16-50 - 17	0.1186	0.0046	0.0535	0.0026	0.891	0.0095	0.49405	17.5	1920	140	336	32	496.7	6.9	360	29	215.4	4.7	50.3	1.2
Z16-50 - 57	0.1217	0.00165	0.0529	0.00125	0.884	0.016	0.63855	16.7846	1978	48	332	15	498.4	7.4	773	31	67	3.1	16.69	0.88
Z16-50 - 16	0.1325	0.0048	0.05294	0.0005	0.971	0.0305	-0.36984	15.5421	2140	140	332.6	6.1	717	36	962	62	9900	2000	218	20
Z16-50 - 20	0.17261	0.00085	0.0467	0.0008	1.119	0.0195	0.99579	11.3891	2582.3	17	294.1	9.8	513.8	8	811	12	325.6	6.8	82.3	2.5
Z16-45 - 21	0.07423	0.00049	0.184	0.0025	1.894	0.0265	0.93042	104.011	1047	27	1089	27	1087	15	275	25	144.9	9.9	74.8	5.3
Z16-45 - 9	0.07382	0.00042	0.181	0.00135	1.852	0.016	0.7013	103.623	1035	23	1072.5	15	1067	16	1261	57	556	15	335.2	6.7
Z16-45 - 6	0.07381	0.0004	0.1804	0.00135	1.848	0.017	0.85937	103.275	1035.1	22	1069	15	1054	16	674	60	328	40	175	21
Z16-45 - 45	0.0738	0.00047	0.1811	0.0014	1.857	0.0165	0.63432	103.163	1040	23	1072.9	16	1055	16	260	13	215	12	118.3	5.9
Z16-45 - 36	0.07377	0.00045	0.17979	0.0012	1.842	0.018	0.85714	103.075	1034	24	1065.8	13	1174.6	12	640	16	195	12	165	6
Z16-45 - 22	0.07425	0.000455	0.18118	0.00125	1.865	0.0165	0.44138	102.521	1047	25	1073.4	14	1045.9	14	658	31	294	20	149	8
Z16-45 - 11**	0.07376	0.0004	0.1788	0.00205	1.825	0.022	0.97085	102.515	1034	22	1060	22	1099	19	431	46	146.7	2.9	95.7	5.1
Z16-45 - 41	0.07456	0.00048	0.1824	0.00135	1.882	0.0185	0.77531	102.273	1056	26	1080	15	1050.7	12	384	28	327	20	174.9	8.6
Z16-45 - 17	0.07396	0.000495	0.1787	0.0013	1.845	0.0185	0.74996	101.983	1039	27	1059.6	14	1049.1	14	353	12	350	15	201.3	7.1
Z16-45 - 60	0.07423	0.0004	0.1795	0.0013	1.858	0.0175	0.49969	101.662	1046.8	22	1064.2	14	1074.2	12	932	56	196	12	135.6	4.8
Z16-45 - 59	0.07389	0.000455	0.1776	0.00125	1.822	0.017	0.61782	101.132	1042	22	1053.8	14	1172	59	203	18	94.3	8.8	71.2	4.6
Z16-45 - 30	0.07467	0.000415	0.1807	0.0013	1.874	0.0165	0.5909	101.105	1059	22	1070.7	14	1079	22	163	21	191	23	104.8	9.4
Z16-45 - 19	0.07453	0.000415	0.1798	0.0012	1.855	0.017	0.68048	101.033	1055	22	1065.9	13	1056.1	12	222	15	138.7	6.9	74.2	3
Z16-45 - 4	0.0739	0.00045	0.1763	0.00145	1.811	0.0195	0.88303	100.867	1038	25	1047	16	1061.4	13	202	10	110.8	5.7	65.1	2.1
Z16-45 - 48	0.07396	0.00043	0.1765	0.0015	1.811	0.0185	0.78715	100.866	1039	24	1048	17	1066.2	12	411.6	8	236.1	4.8	150.1	7.5
Z16-45 - 18	0.07418	0.000425	0.1773	0.00165	1.826	0.0225	0.95432	100.67	1045	23	1052	18	1046.9	14	367	17	185	12	107.7	8.3
Z16-45 - 2	0.07421	0.00043	0.1774	0.0013	1.83	0.017	0.72028	100.65	1046	23	1052.8	14	1283	16	147.8	6.7	115.8	6.1	74.3	2.8
Z16-45 - 10	0.07406	0.00045	0.1766	0.00185	1.814	0.023	0.98392	100.576	1042	25	1048	20	1065	12	220	11	142.9	7.5	86.4	2.9
Z16-45 - 55	0.07427	0.0005	0.1772	0.0015	1.823	0.021	0.79623	100.478	1047	28	1052	17	1049.1	14	340	27	252	24	143	12
Z16-45 - 7	0.07448	0.00055	0.1783	0.0017	1.839	0.0195	0.73052	100.475	1053	29	1058	18	1065.9	12	515	58	380	40	227	22
Z16-45 - 34	0.07396	0.000475	0.1756	0.00125	1.803	0.017	0.59611	100.356	1039	26	1042.7	14	1050	17	351	30	265	22	158	10
Z16-45 - 29	0.07392	0.000415	0.1753	0.0013	1.796	0.0175	0.85578	100.328	1038	23	1041.4	14	1294	25	177.6	8.3	158.8	3.7	98.4	5.7
Z16-45 - 20	0.07475	0.000425	0.1791	0.0013	1.861	0.0185	0.89823	100.104	1061	23	1062.1	14	1100	18	1203	74	577	28	374	15
Z16-45 - 38	0.07408	0.00047	0.1756	0.0015	1.804	0.019	0.85804	100.096	1042	25	1043	16	1060.4	13	321	10	168.8	5.6	104.3	3.3
Z16-45 - 33	0.07396	0.000495	0.1749	0.0013	1.794	0.018	0.66526	100.029	1039	27	1039.3	14	1109.9	12	815	97	180.7	7.8	118.9	4.3
Z16-45 - 39	0.0744	0.000395	0.1771	0.0014	1.833	0.0175	0.88334	99.7155	1054.3	25	1051.3	15	1064.1	11	368	38	148	17	90.1	7.4
Z16-45 - 53	0.07509	0.00049	0.1796	0.00145	1.872	0.017	0.66474	99.5327	1070	26	1065	16	1046.6	12	189.4	9.6	178	15	96.1	6.1
Z16-45 - 58**	0.07426	0.000415	0.1755	0.00165	1.801	0.0185	0.95919	99.5224	1047	22	1042	18	1079	19	256	15	114	20	65	14
Z16-45 - 44	0.07427	0.00043	0.1756	0.0013	1.815	0.017	0.72098	99.5038	1048	23	1042.8	14	1300	150	254.5	7.1	197	26	169	31
Z16-45 - 26	0.07443	0.0005	0.1761	0.00155	1.816	0.0205	0.81882	99.3346	1052	27	1045	17	1040	21	299	10	183.8	3.8	107.3	2.1
Z16-45 - 54	0.07442	0.00042	0.1757	0.00135	1.815	0.0175	0.81005	99.1635	1052	23	1043.2	15	1053.5	12	271.3	7.7	163.4	3.4	101.9	1.8
Z16-45 - 43	0.07364	0.00045	0.1717	0.00125	1.759	0.0175	0.8627	99.1553	1030	25	1021.3	14	1050.7	12	677	22	207	11	107.3	9.2
Z16-45 - 23	0.0741	0.000405	0.17393	0.0012	1.786	0.0155	0.8122	99.0798	1043.3	22	1033.7	13	1084.8	13	1097	33	564	6.2	332	11
Z16-45 - 15	0.07585	0.00044	0.1816	0.0019	1.916	0.0215	0.93226	98.7156	1090	23	1076	21	1073	11	312	17	190.8	9.3	104	3.5
Z16-45 - 56	0.07504	0.000485	0.1775	0.00135	1.86	0.022	0.88772	98.6236	1068	26	1053.3	15	1086	30	256	20	184	19	117.1	9.6
Z16-45 - 12	0.07496	0.000425	0.1772	0.00165	1.845	0.018	0.9281	98.5929	1066	23	1051	18	1061.4	13	604	96	391	67	222	37
Z16-45 - 35	0.07452	0.00039	0.17499	0.00115	1.8066	0.015	0.88186	98.5683	1054.7	21	1039.6	13	1074.8	13	212.7	6.9	116.8	4.4	72.9	2
Z16-45 - 51	0.07445	0.000415	0.1737	0.0012	1.787	0.0155	0.58126	98.0627	1053	22	1032.6	13	1040.4	11	362	25	175	13	96.3	4.7
Z16-45 - 37	0.07404	0.00041	0.17057	0.0012	1.757	0.0155	0.67126	97.428	1042	22	1015.2	13	1009.5	11	889	42	250.6	4.4	132.1	2.6
Z16-45 - 13**	0.07473	0.00044	0.1734	0.00135	1.783	0.019	0.90486	97.2264	1060	24	1030.6	15	1047.8	11	1079	28	227.8	6.3	113.4	3.7
Z16-45 - 3	0.0775	0.00047	0.1812	0.00205	1.953	0.028	0.98219	94.7043	1133	24	1073	23	1057.2	13	293	19	229	18	120.4	6.4
Z16-45 - 28	0.07556	0.000455	0.1722	0.0016	1.8	0.0175	0.90516	94.6396	1082	24	1024	17	1043.2	13	324	24	278	21	149.4	8.8
Z16-45 - 1	0.0789	0.0007	0.1809	0.0018	1.984	0.0175	0.50905	92.2022	1167	34	1076	18	1107	41	359	12	302	11	175.1	7.1
Z16-45 - 25	0.07484	0.00039	0.16383	0.00115	1.7025	0.0145	0.43151	91.9778	1063.3	21	978	13	1123	17	316.6	9.7	211.8	9.4	118.3	2.9
Z16-45 - 16	0.0771	0.0005	0.1713	0.0013	1.827	0.0175	0.81093	90.7658	1123	26	1019.3	14	1062.8	12	392	15	145	12	81.6	4.5
Z16-45 - 5	0.0783	0.0007	0.176	0.00325	1.917	0.044	0.90565	90.5546	1154	37	1045	35	1088.9	13	1086	13	611.8	8.4	353.1	6.2
Z16-45 - 50	0.0783	0.00065	0.1758	0.0016	1.911	0.018	0.24129	90.4679	1154	34	1044	18	1029.5	11	751	36	331	13	193.3	6
Z16-45 - 46	0.0803	0.0013	0.1753	0.00145	1.956	0.0265	0.68051	86.75	1200	63	1041	16	1068.6	12	378	28	131	5.6	73.6	2.6
Z16-45 - 14	0.0818	0.0008	0.17877	0.00125	2.023	0.0255	0.49922	85.7074	1237	40	1060.2	14	1067.2	13	389.8	8.7	212.2	5.3	116.5	4.1
Z16-45 - 32	0.0783	0.0008	0.165	0.0014	1.788	0.029	0.89402	85.4293	1153	40	985	16	1030.4	13	226	14	143.2	8.5	72.4	2.9
Z16-45 - 8	0.0788	0.0005	0.1657	0.0013	1.799	0.0195	0.63714	84.7513	1166	26	988.2	14	1043.9	13	131.9	5.5	94.5	3.5	49.2	1.2
Z16-45 - 47	0.08021	0.00055	0.1686	0.0014	1.88	0.017	0.57407	83.6803	1201	26	1005	15	1039.1	14	523	33	387	11	185.3	3.5
Z16-45 - 42	0.0883	0.0033	0.1776	0.0015	2.19	0.095	0.83222	77.7206	1360	140	1057	18	1045.1	14	307	15	186.9	8.5	84.6	4.2
Z16-45 - 57	0.0855	0.00275	0.1655	0.00135	1.98	0.06	0.21012	74.7803	1320	120	987.1	15	1051	15	376.4	8.4	301.7	8.5	160.3	2.8
Z16-45 - 52	0.0851	0.0009	0.1615	0.00335	1.897	0.031	0.85256	73.384	1315	40	965	37	1040.7	11	289	14	135.7	7.6	65.5	2.6
Z16-45 - 31	0.0863	0.00265	0.1614	0.00405	1.923	0.019	0.56433	72.4812	1330	120	964	45	1053	15	155.8	7.4	121.3	8.6	59.8	4.9
Z16-45 - 40	0.09801	0.00065	0.1854	0.0014	2.538	0.028	0.53249	69.1735	1585	26	1096.4	15	1059.4	14	237.1	9	189.7	4.8	92	2.4
Z16-45 - 24	0.099	0.00105	0.1875	0.002	2.578	0.0435	0.78022	68.6068	1615	34	1108	22	1045.3	13	419	13	158.9	8.6	80.5	2.6
Z16-45 - 27	0.105	0.0095	0.1816	0.00255	2.66	0.285	0.99566	65.1515	1650	310	1075	28	1071.2	12	246	12	205	11	100.9	3
Z16-45 - 49	0.11041	0.00065	0.1408	0.00115	2.18	0.0195	0.47675	47.036	1805	21	849	13	1055.3	13	256	17	225	14	103.7	5.2
Z16-42 - 26	0.0714	0.00075	0.1768	0.00265	1.723	0.028	0.83629	108.592	966	44	1049	29	1048	17	57.9	1.5	50.3	1.1	24.04	0.82
Z16-42 - 28	0.0714	0.0008	0.1739	0.0027	1.718	0.036	0.86886	107.039	966	46	1034	30	1035	17	80	5.8	34.3	2	14.89	0.59
Z16-42 - 24	0.0723	0.00095	0.173	0.003	1.734	0.045	0.90679	103.525	993	53	1028	33	1017	18	43	4.8	18.2	2.3	9.01	0.78
Z16-42 - 14	0.0736	0.0009	0.1786	0.0034	1.814	0.0435	0.85907	103.116	1027	49	1059	37	1011	24	36.7	2	20.4	1.7	9.64	0.28
Z16-42 - 37	0.0744	0.0007	0.1824	0.002	1.879	0.026	0.66595	102.955	1049	38	1080	22	1005	23	30.4	1.6	14.53	0.79	8.03	0.6
Z16-42 - 44	0.0727	0.0006	0.1727	0.0016	1.723	0.021	0.74381	102.495	1002	34	1027	18	1038	28	17.27	0.64	8.18	0.75	3.5	0.14
Z16-42 - 52	0.07298	0.0005	0.1745	0.00145	1.765	0.0205	0.77246	102.47	1012	28	1037	16	1032	25	32.5	3.3	14.9	1.2	6.99	0.47
Z16-42 - 19	0.0731	0.0007	0.1737	0.0026	1.741	0.028	0.84412	101.775	1014	39	1032	28	1017	15	138.4	3.8	112.5	4.3	51.2	2.3
Z16-42 - 39	0.0732	0.00065	0.1739	0.0016	1.769	0.022	0.56094	101.772	1016	37	1034	17	1094	33	20.4	1.4	13.14	0.81	6.4	0.31
Z16-42 - 13	0.07335	0.00055	0.1752	0.00155	1.78	0.0205	0.8149	101.761	1022	30	1040	17	1049	31	23.81	0.82	10.6	1.2	5.05	0.11
Z16-42 - 55	0.07349	0.00047	0.1755	0.00165	1.773	0.018	0.7053	101.657	1026	26	1043	18	1027	17	55	2.8	21.1	1.2	10.08	0.23
Z16-42 - 8	0.0748	0.0006	0.1821	0.0019	1.871	0.029	0.8688	101.602	1061	31	1078	21	1033	16	39.4	2	26.6	1.6	12.78	0.49
Z16-42 - 20	0.0729	0.00085	0.1724	0.0028	1.714	0.027	0.78635	101.485	1010	46	1025	31	1017	21	37.7	1.5	21.8	3	10.9	1.2
Z16-42 - 41	0.0736	0.00075	0.1757	0.0014	1.772	0.023	0.54983	101.311	1030	41	1043.5	15	976	14	63.8	2	24	1.1	10.73	0.21
Z16-42 - 40	0.0741	0.00085	0.1769	0.00255	1.828	0.0325	0.64518	100.768	1042	47	1050	28	1041	17	83.8	5.5	35.9	1.9	15.9	1.1
Z16-42 - 25	0.07323	0.0006	0.1723	0.0023	1.747	0.0275	0.88569	100.491	1019	33	1024	26	1048.2	14	68.7	3.5	59.7	3.4	27.7	1
Z16-42 - 45	0.0733	0.00075	0.1718	0.00255	1.736	0.032	0.86916	100.294	1019	40	1022	28	1037	18	39	2.8	30	3.2	14.2	1.4
Z16-42 - 34	0.0734	0.00075	0.1725	0.00255	1.766	0.022	0.74984	100.293	1023	40	1026	28	1025	20	71.8	6.7	29.5	1.9	12.64	0.74
Z16-42 - 23	0.07352	0.0006	0.1733	0.00185	1.751	0.023	0.73719	100.292	1027	32	1030	20	1021	23	23.4	3	13.5	1.8	5.98	0.59
Z16-42 - 30	0.0732	0.00075	0.171	0.00205	1.719	0.033	0.87535	100.098	1016	43	1017	22	1020	15	56.2	3.6	30.2	2.5	13.7	1.1
Z16-42 - 59	0.0736	0.0006	0.1725	0.0019	1.749	0.0245	0.80438	99.8054	1028	34	1026	21	1025.7	13	75.2	1.8	43.9	1.4	20.53	0.77
Z16-42 - 33	0.0748	0.00085	0.1776	0.00195	1.837	0.031	0.76308	99.5279	1059	45	1054	21	1055	24	34.6	2.7	21.3	1.3	10.55	0.52
Z16-42 - 50	0.0722	0.0008	0.1642	0.0017	1.636	0.0245	0.31791	99.09	989	46	980	19	1016.1	13	91.4	2.2	54.1	1.6	24.01	0.95
Z16-42 - 1	0.07425	0.00055	0.1745	0.0022	1.788	0.0225	0.82238	99.0449	1047	29	1037	24	1032	19	26.4	1.2	14.46	0.95	7.01	0.21
Z16-42 - 46	0.0735	0.00075	0.1706	0.00255	1.734	0.03	0.84294	98.9279	1026	41	1015	28	1047	16	49.5	1.8	26.8	4.5	13	2
Z16-42 - 29	0.0738	0.00075	0.1729	0.00255	1.766	0.034	0.86673	98.7512	1041	44	1028	28	1025.8	14	76.3	1.2	28.7	0.6	12.87	0.25
Z16-42 - 10	0.07344	0.000485	0.17	0.0014	1.723	0.02	0.86622	98.7317	1025	27	1012	16	1028	18	56.3	3.4	26.2	2.1	12.41	0.78
Z16-42 - 58	0.0743	0.00075	0.174	0.0022	1.805	0.022	0.72847	98.6641	1048	40	1034	24	1058	22	38.3	2.2	25.1	1.8	12.02	0.55
Z16-42 - 12	0.07453	0.00045	0.1746	0.0022	1.789	0.0235	0.8837	98.2938	1055	24	1037	24	1034	16	51.3	4.4	19.5	1.9	8.92	0.54
Z16-42 - 35	0.07419	0.00055	0.1726	0.0016	1.77	0.0215	0.74546	98.1818	1045	30	1026	18	1035	17	85.2	3.6	68.3	2.8	28.2	1.1
Z16-42 - 53	0.07427	0.00055	0.1729	0.00185	1.773	0.0235	0.84139	98.0916	1048	30	1028	20	1021	22	58.9	2.7	44.4	2.5	21.01	0.65
Z16-42 - 22	0.0744	0.001	0.1727	0.0025	1.785	0.038	0.7622	97.9962	1048	53	1027	28	1015	25	48.5	3.1	39.3	3.6	17.9	1.5
Z16-42 - 38	0.0738	0.00049	0.1701	0.00135	1.721	0.0165	0.71813	97.8261	1035	27	1012.5	15	984	19	66.8	5.1	47.7	5.8	22.2	2.3
Z16-42 - 16	0.07424	0.000485	0.172	0.00135	1.747	0.019	0.82203	97.6886	1047	26	1022.8	15	1028	23	30.7	1.3	18.5	1.4	8.5	0.22
Z16-42 - 47	0.0741	0.00085	0.1737	0.00185	1.778	0.0245	0.72058	97.6348	1057	37	1032	20	1015	27	51.2	3.5	33.5	2	16.4	0.49
Z16-42 - 56	0.07421	0.0005	0.1709	0.0013	1.746	0.018	0.64817	97.2562	1046	28	1017.3	15	1009	15	62.1	3	43	1.6	19.65	0.43
Z16-42 - 48	0.0741	0.0006	0.17	0.00185	1.759	0.024	0.70509	97.1209	1042	34	1012	20	1360	51	36.2	1.2	34.2	1.5	19	1.1
Z16-42 - 51	0.0745	0.00095	0.1713	0.0023	1.747	0.035	0.72231	97.0476	1050	52	1019	25	1021	17	105.1	9.2	59.4	2.6	25.9	1.5
Z16-42 - 21	0.0751	0.0007	0.1749	0.00175	1.809	0.0235	0.68667	96.5613	1076	40	1039	19	1062.1	13	103.2	4.5	41.1	1.7	21.11	0.76
Z16-42 - 5	0.07422	0.00055	0.1696	0.0016	1.76	0.022	0.76244	96.5583	1046	29	1010	18	1058	18	63.2	1	38.7	1.3	19.5	0.33
Z16-42 - 27	0.07413	0.000435	0.1691	0.0017	1.733	0.0225	0.98083	96.4559	1044	24	1007	19	1037	28	21	1.8	13.9	1.1	6.64	0.69
Z16-42 - 32	0.0754	0.00065	0.1747	0.00155	1.808	0.019	0.6182	96.2894	1078	33	1038	17	1075	28	45.7	7	23.4	4.3	11.7	1.6
Z16-42 - 17	0.0741	0.00125	0.1716	0.0025	1.78	0.0385	0.64828	95.9586	1064	54	1021	28	1034	16	38.9	1.8	23.7	1.4	10.89	0.4
Z16-42 - 7	0.0746	0.00065	0.1702	0.00155	1.754	0.024	0.881	95.928	1056	35	1013	17	1065	21	34.3	1.1	20.4	1.6	9.92	0.74
Z16-42 - 4	0.0746	0.0007	0.1697	0.0017	1.746	0.0275	0.83501	95.7346	1055	39	1010	19	1025	25	30.4	1.7	22.3	1.3	10.06	0.43
Z16-42 - 36	0.07411	0.00055	0.1674	0.00145	1.703	0.0205	0.78165	95.6855	1043	31	998	16	1014	20	49.6	2.4	37.5	1.7	16.93	0.58
Z16-42 - 2	0.0759	0.0006	0.1753	0.002	1.836	0.0255	0.70899	95.5046	1090	32	1041	22	1067	16	49.4	4.2	34.9	3.7	17.3	1.7
Z16-42 - 6	0.0739	0.00105	0.1655	0.00135	1.709	0.032	0.69389	95.1784	1037	57	987	15	1017	16	68.5	2.6	27.7	1.1	12.47	0.35
Z16-42 - 54	0.07617	0.0006	0.1736	0.00225	1.857	0.0295	0.83429	93.9891	1098	32	1032	25	1073	19	33.1	2.4	18.6	1.5	9.88	0.53
Z16-42 - 11	0.0754	0.00085	0.1696	0.00235	1.764	0.0265	0.7212	93.9535	1075	45	1010	26	1031	16	44.7	2.1	30.8	1.2	14.31	0.37
Z16-42 - 49	0.0755	0.00065	0.1663	0.0018	1.732	0.02	0.74516	91.937	1079	34	992	20	1030	18	46.9	2.7	35.2	1.3	15.84	0.49
Z16-42 - 42	0.0737	0.00065	0.1585	0.0013	1.616	0.0185	0.66623	91.9089	1032	36	948.5	14	1041	16	47.9	4.9	21.4	3.6	10.7	1.1
Z16-42 - 18	0.0774	0.00065	0.1735	0.00175	1.861	0.022	0.59547	91.2467	1131	33	1032	19	1020	34	41.1	1.2	28.6	3.3	14.7	1.2
Z16-42 - 3	0.0783	0.00135	0.1763	0.0019	1.886	0.0395	0.60776	91.0435	1150	69	1047	21	1035	19	26.2	1.5	16.7	1.6	7.66	0.44
Z16-42 - 57	0.0773	0.0007	0.1728	0.00155	1.847	0.018	0.094293	90.4134	1137	41	1028	17	1032	16	58	2.2	22.64	0.85	11.49	0.17
Z16-42 - 43	0.0756	0.0009	0.1616	0.0029	1.69	0.0295	0.90077	89.2791	1082	48	966	32	1033	15	74.6	4.3	58.7	4.4	28.7	1.8
Z16-42 - 60	0.0776	0.0012	0.1652	0.00235	1.772	0.0255	0.34547	87.0911	1131	60	985	26	1038	15	70.5	1.2	57.4	2.7	25.7	1.2
Z16-42 - 9	0.0773	0.00065	0.164	0.002	1.723	0.0235	0.68991	86.8678	1127	34	979	22	1070	21	32.9	2.7	16.2	1.4	7.83	0.5
Z16-42 - 15	0.0809	0.00165	0.1751	0.00225	1.943	0.0475	0.65951	86.0215	1209	79	1040	25	1035.4	13	77.7	2.3	47.5	2.2	22.2	1.2
Z16-42 - 31	0.1129	0.00375	0.1819	0.0021	2.84	0.095	0.089926	58.8525	1830	130	1077	23	1027	18	58.6	3.1	45	2.8	19.61	0.93
Z16-41 - 38	0.0731	0.0008	0.1829	0.00275	1.841	0.0305	0.74445	106.811	1013	44	1082	30	1036	16	71.8	4.2	37.2	2.8	17.8	1.5
Z16-41 - 20	0.0738	0.00135	0.1851	0.00395	1.882	0.048	0.71338	106.002	1033	76	1095	43	1009	16	197.9	3.7	160.1	6.4	73.5	3
Z16-41 - 40	0.07317	0.00055	0.1796	0.0021	1.82	0.026	0.84245	104.621	1017	32	1064	23	1073	23	99.8	1.6	44.79	0.91	21.35	0.77
Z16-41 - 35	0.07408	0.0005	0.1806	0.00215	1.83	0.0285	0.81189	102.589	1043	28	1070	24	1056	20	52.2	6.2	44.1	3.8	21.7	1.5
Z16-41 - 11	0.07353	0.00055	0.177	0.00135	1.794	0.017	0.44727	102.218	1028	29	1050.8	15	1033	18	55	7.6	34.4	2.4	16.1	1.5
Z16-41 - 6	0.07276	0.0006	0.1725	0.002	1.749	0.024	0.78306	101.988	1006	33	1026	22	1025.5	12	166	6.5	109.8	4.3	50.2	1.1
Z16-41 - 54	0.0734	0.00065	0.1757	0.00205	1.776	0.024	0.75334	101.955	1023	35	1043	23	1035	17	29.3	1.7	20.9	1.8	10.24	0.49
Z16-41 - 31	0.0732	0.0007	0.1738	0.00175	1.737	0.0235	0.61088	101.573	1017	40	1033	19	1027	19	54.3	3.1	25.67	0.97	12.94	0.46
Z16-41 - 57	0.07309	0.0006	0.1732	0.00135	1.753	0.02	0.64574	101.568	1014	32	1029.9	15	1026	18	67.4	5.8	37.7	1.6	18.38	0.75
Z16-41 - 25	0.0735	0.0009	0.1754	0.0022	1.808	0.025	0.65283	101.561	1025	50	1041	24	1004.4	15	70.7	3.8	24.4	1	11.2	0.24
Z16-41 - 28	0.0741	0.0007	0.1785	0.0014	1.818	0.021	0.64064	101.496	1043	37	1058.6	15	1139.7	14	44.1	2.4	19.8	1.1	11.54	0.39
Z16-41 - 2	0.073	0.0007	0.1726	0.00195	1.737	0.0255	0.71774	101.484	1011	40	1026	21	1054	33	23.2	4.1	14.4	3.7	7.7	1.7
Z16-41 - 10	0.074	0.00085	0.1774	0.00225	1.818	0.03	0.78834	101.347	1039	47	1053	25	1023	15	57.5	2.4	34	4.4	16.1	2
Z16-41 - 26	0.07342	0.00055	0.1738	0.00165	1.754	0.0205	0.86916	100.879	1024	30	1033	18	1012	21	89	16	53	11	24.1	4.8
Z16-41 - 36	0.07376	0.00049	0.1756	0.00165	1.783	0.0225	0.87322	100.87	1034	27	1043	18	1003	17	67.8	4.9	26.6	2.5	11.52	0.9
Z16-41 - 32	0.0735	0.0005	0.1733	0.0017	1.752	0.02	0.73082	100.39	1026	28	1030	18	1016.7	14	84.3	4.6	27	1.4	13.45	0.67
Z16-41 - 17	0.0733	0.0006	0.1717	0.00255	1.732	0.0255	0.8619	100.098	1020	34	1021	28	1044	17	55.2	2.5	28.7	2.1	13.99	0.93
Z16-41 - 27	0.07357	0.0006	0.1731	0.00145	1.761	0.0205	0.62875	100.097	1028	33	1029	16	1046.4	14	168	13	126.2	9.1	62.9	7
Z16-41 - 19	0.07428	0.0005	0.1764	0.0017	1.803	0.0195	0.98249	99.9046	1048	28	1047	18	1052	19	36.6	2.6	27.4	2	12.12	0.72
Z16-41 - 30	0.074	0.0008	0.1749	0.00205	1.764	0.0215	0.78044	99.9038	1040	45	1039	23	1032	16	28.8	2.3	19.2	3	9.7	1.3
Z16-41 - 55	0.07328	0.0006	0.1711	0.00145	1.736	0.021	0.62944	99.8039	1020	32	1018	16	1043.3	12	166.9	3.7	108.8	3.9	48.5	2.3
Z16-41 - 53	0.07386	0.00055	0.1738	0.00195	1.76	0.0275	0.87654	99.7104	1036	31	1033	21	1031	15	42.8	4.3	25.1	3.3	11.5	1.1
Z16-41 - 39	0.0747	0.0009	0.178	0.006	1.825	0.05	0.94922	99.5279	1059	50	1054	67	1049	17	28.4	1.3	18.2	0.92	8.67	0.21
Z16-41 - 12	0.073	0.00095	0.1681	0.00225	1.687	0.0265	0.6742	99.2071	1009	53	1001	25	1022	19	42.2	3.2	26.1	2.8	12.63	0.97
Z16-41 - 3	0.0748	0.0012	0.1769	0.0033	1.827	0.046	0.7652	99.0566	1060	66	1050	36	1026	20	42.6	1.4	28.12	0.6	13.28	0.36
Z16-41 - 13	0.07405	0.00055	0.1732	0.0025	1.774	0.024	0.91167	98.9433	1041	31	1030	27	1022	18	51.2	3	32	3.1	15	1.6
Z16-41 - 7	0.0738	0.00065	0.172	0.0017	1.752	0.026	0.86025	98.9362	1034	36	1023	19	1048	18	49.5	4.1	18.8	2.1	7.99	0.71
Z16-41 - 1	0.07364	0.000455	0.1719	0.0014	1.746	0.0165	0.79932	98.8685	1034	23	1022.3	16	1040	15	75.9	1.6	28.6	1	12.78	0.31
Z16-41 - 5	0.07409	0.00055	0.1731	0.00165	1.775	0.022	0.86526	98.7524	1042	29	1029	18	1028	15	64.9	4.7	26.1	1.9	12.7	0.74
Z16-41 - 49	0.0742	0.00065	0.1733	0.00185	1.773	0.0265	0.82098	98.659	1044	36	1030	20	1015	18	38.7	2.1	24.2	1.7	11.37	0.73
Z16-41 - 34	0.0741	0.0007	0.1715	0.00255	1.751	0.0295	0.8383	98.6577	1043	40	1029	32	1034	25	35.1	3.1	26.1	2.1	12.49	0.95
Z16-41 - 16	0.07332	0.000495	0.1692	0.0014	1.722	0.0185	0.69526	98.5714	1022	28	1007.4	15	1003	20	32.8	1.4	19	1.2	9.27	0.59
Z16-41 - 58	0.07418	0.00055	0.1732	0.0013	1.766	0.019	0.72014	98.5359	1045	29	1029.7	14	1054	37	60.1	5.7	23	2.3	9.9	2.1
Z16-41 - 45	0.07383	0.00055	0.171	0.00225	1.748	0.0265	0.85545	98.2609	1035	31	1017	25	1032	16	73	3	31.4	1.9	14.8	1.2
Z16-41 - 56	0.07383	0.000425	0.1707	0.0018	1.741	0.022	0.95758	98.0695	1036	23	1016	20	1052	15	45.4	4	26	2.3	12.22	0.78
Z16-41 - 37	0.0733	0.0008	0.1672	0.0017	1.717	0.0235	0.72472	97.7451	1020	43	997	19	1052	22	36.6	2	23.9	1.3	11.98	0.36
Z16-41 - 51	0.07299	0.0006	0.1656	0.0019	1.664	0.0235	0.78071	97.6285	1012	33	988	21	1058	25	73.9	7.7	58.9	6.2	26.3	2.7
Z16-41 - 18	0.07438	0.00055	0.1723	0.00215	1.768	0.025	0.79514	97.5262	1051	31	1025	24	1034	15	81.6	5.6	24.1	1.6	11.3	0.33
Z16-41 - 60	0.0741	0.00065	0.171	0.00125	1.743	0.0265	0.77822	97.4904	1044	37	1017.8	14	1060	22	21.4	1.3	11.4	1.1	5	0.2
Z16-41 - 9	0.07476	0.00055	0.1737	0.0021	1.798	0.0235	0.77435	97.2667	1061	30	1032	23	1030	31	75.1	9.4	36.4	1.6	15.26	0.52
Z16-41 - 14	0.07373	0.0006	0.1683	0.00215	1.71	0.0275	0.92875	97.1899	1032	32	1003	24	1074	34	71	6.2	25.6	3.9	11.9	1.4
Z16-41 - 52	0.0735	0.0007	0.1674	0.00185	1.697	0.019	0.49562	97.1762	1027	40	998	21	1020	19	48.5	3.3	24.1	1.6	10.62	0.48
Z16-41 - 23	0.07498	0.0005	0.1735	0.00135	1.786	0.0205	0.82559	96.6729	1067	28	1031.5	15	1098	20	40.9	2	27.5	1.5	14.24	0.49
Z16-41 - 4	0.0756	0.00105	0.1761	0.0028	1.835	0.0345	0.65188	96.6728	1082	57	1046	31	995	18	47.2	3.7	21	1.3	9.96	0.31
Z16-41 - 41	0.07469	0.000485	0.172	0.00165	1.769	0.0205	0.86781	96.6006	1059	26	1023	18	1044	22	62.1	9.9	46	9.6	21	4
Z16-41 - 24	0.0737	0.00075	0.166	0.00175	1.686	0.0225	0.57589	95.9302	1032	42	990	20	1058	23	44.3	3	22.2	1.2	11.42	0.4
Z16-41 - 47	0.0747	0.0007	0.1702	0.0016	1.77	0.025	0.84382	95.8373	1057	37	1013	18	1085	40	23.09	0.98	14.75	0.88	8.05	0.93
Z16-41 - 42	0.0759	0.00155	0.1801	0.00385	1.92	0.06	0.56812	95.4383	1118	95	1067	42	1022	16	58.1	3.6	31.3	2.2	14.3	1.2
Z16-41 - 22	0.07412	0.00041	0.1669	0.00175	1.703	0.0205	0.94037	95.3065	1044	22	995	19	1042	15	59.9	1.2	23.8	1.1	10.96	0.27
Z16-41 - 46	0.0749	0.00095	0.1704	0.0028	1.759	0.0425	0.88036	95.3008	1064	51	1014	31	1034	18	54	2.8	43.5	2	19.26	0.65
Z16-41 - 43	0.0756	0.00085	0.1738	0.00175	1.811	0.023	0.61839	94.5971	1092	40	1033	19	1031	20	66.9	2.1	25.9	1.2	12.52	0.34
Z16-41 - 44	0.07579	0.0006	0.1729	0.0018	1.797	0.03	0.89972	94.4853	1088	30	1028	20	1007	14	135.1	4.2	104.2	2.6	47.6	1.3
Z16-41 - 21	0.0763	0.001	0.1761	0.002	1.838	0.032	0.65577	94.229	1109	50	1045	22	1037	18	78.4	3.8	32.4	2.5	14.14	0.83
Z16-41 - 29	0.0751	0.0007	0.1681	0.0015	1.74	0.021	0.68195	93.7325	1069	36	1002	17	1035	19	64.3	1.7	64.6	1.5	29.62	0.65
Z16-41 - 8	0.0775	0.0006	0.1768	0.00235	1.879	0.0335	0.98425	92.6743	1133	31	1050	26	1024	16	160	33	140	34	63	14
Z16-41 - 15	0.07513	0.00055	0.1636	0.0015	1.683	0.0175	0.63789	91.2232	1071	29	977	17	1172	53	15.7	1.5	13.2	2.7	7.17	0.93
Z16-41 - 48**	0.0811	0.0008	0.1751	0.00155	1.95	0.0285	0.725	85.1064	1222	38	1040	17	1028	15	68.4	1.8	31.1	3	14.6	1.5
Z16-41 - 50	0.087	0.0029	0.1848	0.00405	2.18	0.08	0.67515	82.6119	1340	130	1107	51	1117	24	100.9	6.8	53.4	5.2	30.5	2.4
Z16-41 - 33	0.0852	0.0007	0.1766	0.00165	2.073	0.0215	0.676	79.5144	1318	31	1048	18	1032.9	14	84.6	5.5	60.8	3.6	29.4	1.2
Z16-41 - 59	0.0866	0.0009	0.1666	0.00185	2.007	0.035	0.52371	72.8205	1365	49	994	20	1030	15	93.5	1.7	35.4	1.1	16.34	0.45
Z16-40 - 50	0.11914	0.0007	0.3558	0.00325	5.84	0.075	0.94863	101.03	1942	21	1962	31	1725	23	172	10	50.5	2.9	41.7	2.2
Z16-40 - 32	0.07546	0.00043	0.1822	0.0013	1.901	0.016	0.39989	99.8889	1080	23	1078.8	14	1624	18	547	11	120.2	3.3	119.1	9.8
Z16-40 - 24	0.12105	0.0006	0.3538	0.0029	5.907	0.06	0.96348	99.0918	1970.9	18	1953	28	1982.3	14	298.7	4.4	254.1	7.3	240	11
Z16-40 - 57	0.12187	0.0007	0.3535	0.00275	5.932	0.065	0.87419	98.3863	1983	21	1951	26	1860	31	270	18	89.8	3.5	118.2	7
Z16-40 - 45	0.1232	0.0006	0.3552	0.00235	6.045	0.05	0.84245	97.8524	2002.2	18	1959.2	23	2031	20	147.8	5.3	231.8	6.2	231.1	4.1
Z16-40 - 2	0.11693	0.0006	0.3357	0.00315	5.415	0.06	0.96892	97.7526	1908.9	19	1866	31	1952	22	135	11	157	6.7	135.3	5.2
Z16-40 - 42	0.12735	0.00075	0.3644	0.00295	6.394	0.07	0.91736	97.1858	2061	20	2003	28	1757	54	342	34	76.4	2.8	92.9	6.4
Z16-40 - 55	0.1237	0.00065	0.3521	0.00235	6.016	0.05	0.6981	96.7849	2009.3	19	1944.7	22	2237	38	463	19	334	13	528	20
Z16-40 - 27	0.12	0.0008	0.3384	0.0031	5.573	0.049	0.76769	96.0634	1956	24	1879	30	1622.8	14	293	20	59.5	4.3	47.6	3.2
Z16-40 - 31	0.13117	0.00075	0.3666	0.00265	6.625	0.06	0.64892	95.2674	2113	20	2013	25	1714	26	1460	150	3700	2500	1900	1100
Z16-40 - 5	0.11978	0.0006	0.334	0.00265	5.51	0.05	0.97529	95.1796	1952.1	18	1858	26	1895	18	475	11	283	14	284.7	8.2
Z16-40 - 4	0.1334	0.0009	0.3663	0.0025	6.768	0.06	0.50443	93.9356	2142	23	2012.1	23	1587	17	753	39	60.7	2.3	51.8	1.5
Z16-40 - 25	0.1157	0.00075	0.3159	0.00395	5.05	0.08	0.97156	93.5979	1890	24	1769	39	1412	38	907	18	81.8	6.5	73.9	4.2
Z16-40 - 3	0.11325	0.0006	0.3082	0.00295	4.871	0.05	0.96464	93.5508	1851.4	20	1732	29	1745	26	657	55	50.2	2.6	327	12
Z16-40 - 58	0.11762	0.00065	0.3168	0.0038	5.13	0.075	0.9787	92.444	1919	20	1774	38	2255	42	146	20	216	17	243	17
Z16-40 - 23	0.1289	0.0017	0.3433	0.00405	6.07	0.135	0.93001	92.1512	2064	29	1902	39	1806	47	176	33	86.2	3.4	111.5	6.6
Z16-40 - 14	0.084	0.00185	0.2015	0.0049	2.34	0.11	0.9901	91.9192	1287	85	1183	52	1841	25	210	12	167	12	149	10
Z16-40 - 29	0.11197	0.00075	0.2977	0.00385	4.61	0.075	0.98454	91.7531	1831	23	1680	38	2349	24	1371	59	66.3	2.1	1780	180
Z16-40 - 37	0.12188	0.00065	0.3254	0.0022	5.489	0.048	0.85419	91.5788	1983.1	19	1816.1	21	1364	27	595	31	62.2	4.1	113.2	9.1
Z16-40 - 18**	0.1099	0.00085	0.2875	0.00415	4.4	0.09	0.99569	91.2027	1796	28	1638	44	1978.1	15	306	15	154	3.2	147.9	2.8
Z16-40 - 38	0.10267	0.00055	0.2663	0.00225	3.773	0.0395	0.93203	91.0233	1672.1	20	1522	23	1966	18	117.2	8.1	191	14	180	10
Z16-40 - 19	0.10702	0.00065	0.2749	0.00215	4.064	0.043	0.85411	89.5309	1748	22	1565	22	1748	32	269.5	9.6	159	18	167.8	7.3
Z16-40 - 46	0.11235	0.0007	0.2894	0.0033	4.472	0.06	0.96187	89.1671	1837	22	1638	33	1898.8	15	237	7.4	89.1	1.5	86.2	1
Z16-40 - 17	0.11412	0.0006	0.2923	0.00215	4.607	0.041	0.94311	88.6232	1865.2	19	1653	22	1912	99	425	39	120.8	2.8	310	30
Z16-40 - 47	0.10635	0.0006	0.2694	0.00185	3.945	0.0345	0.7766	88.5479	1736.8	20	1537.9	19	2065	37	186.1	6	159	14	194.7	7.9
Z16-40 - 8	0.10773	0.0006	0.2714	0.00215	4.041	0.0395	0.87803	87.9545	1760	21	1548	22	1889	23	278	10	107.3	2.2	130	10
Z16-40 - 7	0.13024	0.0007	0.3292	0.00225	5.931	0.05	0.7662	87.3453	2100.4	19	1834.6	22	2220	60	226	12	99.6	4.9	231	18
Z16-40 - 11	0.1446	0.0027	0.3617	0.0026	7.22	0.15	0.31634	87.319	2279	63	1990	25	1081.3	11	830	40	36.9	1.1	23.3	1.4
Z16-40 - 30	0.1417	0.0025	0.3489	0.00345	6.84	0.175	0.96833	86.0393	2242	61	1929	33	2062.6	16	122.7	7.9	66.7	4.4	73.1	2.5
Z16-40 - 6**	0.1146	0.00115	0.2824	0.00375	4.47	0.095	0.95039	85.6761	1871	36	1603	38	2087	45	226	17	238	13	274.4	6
Z16-40 - 35	0.14058	0.0008	0.342	0.007	6.66	0.14	0.97418	84.8634	2233	20	1895	69	1749	28	400	17	74	3.7	61.4	3.7
Z16-40 - 48	0.1269	0.0008	0.3104	0.0026	5.464	0.06	0.76137	84.8175	2055	22	1743	25	2089	41	85	11	100	16	103	16
Z16-40 - 26	0.121	0.0008	0.2898	0.00225	4.855	0.0425	0.63573	83.2995	1970	23	1641	22	1911.8	15	160	14	190	16	162	14
Z16-40 - 22	0.12628	0.0007	0.3002	0.0021	5.232	0.0465	0.69085	82.7126	2046	20	1692.3	21	1794.4	15	251	19	143	15	132.7	8.3
Z16-40 - 28**	0.146	0.0045	0.3409	0.00405	6.85	0.155	0.68264	82.5764	2290	100	1891	39	1827	27	377	39	87	18	73	12
Z16-40 - 56	0.1187	0.0011	0.2797	0.0047	4.6	0.085	0.88301	82.1189	1935	32	1589	47	1962	18	672	25	90.2	5.7	90.7	6.5
Z16-40 - 12	0.124	0.0042	0.2916	0.00395	5	0.225	0.9269	82.0398	2010	120	1649	39	1983	36	385	12	221	17	237	25
Z16-40 - 61	0.10454	0.0006	0.2407	0.00195	3.468	0.037	0.93676	81.5249	1705	22	1390	21	1857.8	15	779	33	264	20	281	13
Z16-40 - 52	0.0983	0.0011	0.2227	0.00335	3.03	0.075	0.98405	81.5094	1590	42	1296	35	2119	19	183.3	5.1	230	11	274.1	6.4
Z16-40 - 51	0.1626	0.00415	0.3671	0.0029	8.22	0.19	0.58902	81.3559	2478	85	2016	27	1292.2	14	936	28	104.2	3.1	102.9	2.5
Z16-40 - 59	0.1115	0.0012	0.258	0.0022	3.949	0.043	0.052878	81.2294	1822	39	1480	23	1647	17	116.6	7.4	150.2	9.9	111.9	5.3
Z16-40 - 20	0.09201	0.0005	0.2022	0.00145	2.571	0.0235	0.93824	80.9287	1466.6	21	1186.9	15	1709	34	218	11	68.9	3.4	52.8	2.3
Z16-40 - 34	0.1314	0.00205	0.3027	0.0021	5.43	0.075	0.0045879	80.7055	2112	53	1704.5	21	1750.5	15	396	30	120	7.6	99.7	4.8
Z16-40 - 40	0.1227	0.00295	0.2745	0.00285	4.66	0.15	0.95815	78.5141	1992	84	1564	29	1906	51	840	140	68	12	530	110
Z16-40 - 21	0.1528	0.0012	0.3351	0.00355	7.06	0.075	0.83835	78.4091	2376	26	1863	34	1644	71	461	18	104.7	6.4	184	33
Z16-40 - 60	0.158	0.00275	0.3356	0.00285	7.32	0.15	0.5166	76.4441	2441	56	1866	27	1222	64	466	21	55	20	38	14
Z16-40 - 44	0.1317	0.00125	0.2857	0.00435	5.25	0.095	0.70909	76.3679	2120	32	1619	44	1821	43	722	19	49.3	6.6	305	31
Z16-40 - 41	0.1334	0.00175	0.2677	0.00455	4.94	0.135	0.94346	71.4152	2141	46	1529	46	1816	76	1100	29	136	16	247	62
Z16-40 - 9	0.1033	0.0012	0.2046	0.00185	2.921	0.055	0.97321	71.3861	1681	42	1200	20	2138	36	217	15	217.6	9.7	261	17
Z16-40 - 15	0.1232	0.0044	0.2394	0.0025	4.09	0.18	0.97687	69.8485	1980	120	1383	26	2750	150	720	120	13.7	1.9	1610	280
Z16-40 - 49	0.105	0.00165	0.1956	0.0014	2.833	0.05	0.92613	67.2547	1712	57	1151.4	15	1386	28	680	28	54.8	5.1	72.7	5.9
Z16-40 - 33	0.1847	0.0047	0.3108	0.00295	7.94	0.26	0.984	64.9182	2688	87	1745	29	1642.3	16	155.8	8.9	203.1	6.8	149.5	2.5
Z16-40 - 1	0.16257	0.0008	0.2622	0.0034	5.88	0.085	0.96715	60.4803	2481.8	17	1501	35	1965.7	15	275.2	9.5	108.1	5.6	105.9	2.5
Z16-40 - 39	0.1398	0.00295	0.2291	0.00315	4.41	0.07	0.34318	59.8379	2221	73	1329	33	1724	35	240	34	168	14	147.8	9
Z16-40 - 43	0.1994	0.00355	0.2932	0.00235	8.07	0.175	0.60335	58.8361	2818	58	1658	23	1904.1	18	172.1	7.6	246	12	224.4	7
Z16-40 - 13	0.154	0.003	0.2352	0.0025	4.95	0.145	0.59874	57.083	2386	65	1362	26	2081.5	16	143.5	5	219.7	6.7	212.3	3.3
Z16-40 - 36	0.173	0.0065	0.2368	0.00495	5.74	0.33	0.97996	53.4766	2560	130	1369	52	1797	18	221	14	158.4	5.9	129.7	4.4
Z16-40 - 53	0.1571	0.00165	0.2124	0.00245	4.58	0.07	0.71882	51.2588	2423	36	1242	26	1887	19	316	16	106.6	2.7	88.4	1.8
Z16-40 - 16	0.193	0.0075	0.2009	0.0049	5.56	0.165	0.4145	42.8727	2750	130	1179	52	1966	17	428	41	186.3	7.3	332.2	8.1
Z16-40 - 10	0.529	0.04	0.1939	0.00145	14.2	1.05	0.23324	26.5651	4300	240	1142.3	16	2156	34	194.4	7.1	309	15	301	13
Z16-40 - 54	0.403	0.013	0.1655	0.0043	9.11	0.12	0.46103	25.2494	3909	96	987	48	1520	17	360	32	83.2	4.1	99.7	4.1
Z16-35 - 57	0.12632	0.0007	0.3946	0.0027	6.82	0.06	0.80163	104.774	2046.5	19	2144.2	25	1932	24	590	18	1046	34	899	44
Z16-35 - 52	0.1144	0.0006	0.3497	0.0025	5.499	0.048	0.89934	103.391	1869.6	19	1933	24	1887	26	118	11	117	14	106	11
Z16-35 - 46	0.12509	0.0007	0.385	0.0075	6.62	0.13	0.99258	103.346	2029.1	19	2097	69	1833	18	302	17	346	18	301	13
Z16-35 - 160	0.11429	0.0006	0.3471	0.00235	5.395	0.049	0.90752	102.821	1867.9	19	1920.6	23	2025.9	15	581	34	387	26	356	14
Z16-35 - 162	0.11439	0.0006	0.3456	0.00225	5.361	0.0435	0.87262	102.354	1869.5	18	1913.5	21	1952.1	15	770	35	748	38	692	20
Z16-35 - 61	0.12607	0.00065	0.3831	0.0028	6.635	0.06	0.93023	102.349	2043	18	2091	26	1872	25	204.2	6.4	82.6	3.2	68.2	1.9
Z16-35 - 26	0.10867	0.0006	0.3257	0.0027	4.869	0.05	0.93353	102.348	1776.3	19	1818	26	2029	18	300.5	9.8	90.6	7.7	90	4.9
Z16-35 - 92	0.10844	0.0006	0.3241	0.00225	4.81	0.0405	0.76272	102.104	1772.5	20	1809.8	22	1878.7	14	794.2	8.8	1002	14	847	25
Z16-35 - 8	0.12634	0.00065	0.3808	0.00325	6.619	0.065	0.94872	101.617	2046.9	18	2080	31	1536.2	14	247	20	254	23	188	13
Z16-35 - 163	0.11461	0.00065	0.3428	0.0024	5.344	0.048	0.68227	101.447	1872.9	20	1900	23	1908	21	682	45	363	50	318	16
Z16-35 - 67	0.11159	0.0006	0.3312	0.0033	5.052	0.055	0.97205	101.063	1824.6	19	1844	32	1989.1	17	414	16	335	11	297	10
Z16-35 - 122	0.10413	0.00055	0.3041	0.0026	4.324	0.0465	0.95061	100.819	1698.1	20	1712	26	2009	15	613	23	672	28	580	24
Z16-35 - 167	0.10873	0.0006	0.3197	0.0022	4.696	0.04	0.72945	100.619	1777.3	20	1788.3	22	1746	30	697	18	89	12	60.9	5.9
Z16-35 - 78	0.11465	0.0006	0.3397	0.0033	5.339	0.06	0.96428	100.614	1873.5	19	1885	32	1992	18	310	12	229	12	206.1	8.1
Z16-35 - 9	0.1087	0.00075	0.3194	0.0038	4.79	0.065	0.90957	100.563	1777	25	1787	37	2022	19	141	4.2	130.2	3.4	130.4	3.6
Z16-35 - 36	0.12626	0.0007	0.3756	0.00255	6.526	0.055	0.73647	100.489	2045.6	19	2055.6	24	1820	33	52.2	2.1	61.9	2.6	53.1	2.2
Z16-35 - 12	0.12493	0.0006	0.3712	0.00305	6.384	0.06	0.97518	100.39	2027.1	18	2035	29	2813	50	662	16	230.3	5	237	10
Z16-35 - 165	0.13611	0.0007	0.4034	0.0029	7.472	0.065	0.71851	100.349	2177.4	18	2185	27	1729	16	250	13	291	59	228	19
Z16-35 - 147	0.1102	0.00075	0.3237	0.00485	4.81	0.1	0.98503	100.277	1802	25	1807	48	1736	18	278	17	368	23	296	11
Z16-35 - 81	0.12651	0.00065	0.373	0.00315	6.464	0.065	0.96966	99.7462	2049.2	18	2044	30	1996	18	599	12	46.8	2.9	59.1	2.2
Z16-35 - 118	0.1163	0.0008	0.3414	0.00425	5.41	0.08	0.95401	99.7366	1898	24	1893	41	1785	18	570	39	212	15	170.2	8.6
Z16-35 - 135	0.11546	0.0006	0.3386	0.0023	5.31	0.0465	0.82176	99.6607	1886.3	18	1879.9	22	1840.1	15	326.6	6.4	319.6	7.1	266.3	3.3
Z16-35 - 127	0.1116	0.00065	0.3254	0.0024	4.946	0.047	0.81491	99.5068	1825	21	1816	23	1708	23	210	8.4	444.6	9.7	332	10
Z16-35 - 146	0.12367	0.00065	0.3632	0.0032	6.092	0.065	0.96425	99.4027	2009	18	1997	30	1840	17	108.2	2.9	128.6	4	110	1.6
Z16-35 - 89	0.12578	0.0007	0.3693	0.00285	6.375	0.065	0.96313	99.3673	2038.9	20	2026	27	1969	20	144.4	8.6	92.2	8.7	89.9	8.4
Z16-35 - 38	0.12678	0.00065	0.3723	0.0029	6.492	0.06	0.97625	99.3668	2053	18	2040	27	1663	39	200	18	52.9	5.6	57.4	8.4
Z16-35 - 70	0.11285	0.00065	0.3287	0.0024	5.067	0.045	0.79034	99.3062	1844.8	20	1832	23	1919	31	335	14	59.8	2.5	56.5	2.3
Z16-35 - 79	0.11512	0.0006	0.3358	0.0023	5.287	0.048	0.83514	99.2397	1880.9	19	1866.6	22	1783	36	140.2	6.2	116.7	6.4	94.3	4.9
Z16-35 - 100	0.1124	0.00085	0.3266	0.0055	5.02	0.095	0.96835	99.183	1836	27	1821	52	1853.2	16	369	21	107.5	9.1	84.3	4.4
Z16-35 - 69	0.12581	0.00065	0.3682	0.00255	6.354	0.055	0.89086	99.088	2039.4	18	2020.8	24	1839	17	159	3.2	207.6	4.6	172.9	5.5
Z16-35 - 85	0.11447	0.0006	0.3329	0.003	5.21	0.055	0.92055	99.0004	1870.7	19	1852	29	2022	47	476.2	9.2	80.5	2.3	77.9	1.1
Z16-35 - 149	0.11223	0.00065	0.3254	0.0036	4.94	0.065	0.98535	98.9646	1835	21	1816	35	1352	20	608	47	153.2	6.8	157.4	5
Z16-35 - 44	0.1596	0.0008	0.4563	0.0031	10	0.085	0.92729	98.8737	2450.6	17	2423	28	1717	18	516	11	610	190	433	84
Z16-35 - 31	0.11505	0.0006	0.3342	0.00235	5.291	0.0465	0.70387	98.8722	1879.8	19	1858.6	23	1804.6	14	636	23	1124	38	945	17
Z16-35 - 145	0.10711	0.0006	0.3079	0.0022	4.473	0.044	0.84302	98.8686	1750	21	1730.2	22	1900.4	15	382	30	372	36	359	21
Z16-35 - 90	0.10705	0.00065	0.3077	0.00265	4.495	0.048	0.77655	98.8565	1749	22	1729	26	1883.9	16	258	14	463	25	432	18
Z16-35 - 6	0.12582	0.00065	0.3669	0.003	6.363	0.065	0.97853	98.7939	2039.6	18	2015	28	1953.6	16	118.5	6.9	294	17	257	11
Z16-35 - 42	0.10797	0.0006	0.3101	0.00255	4.608	0.05	0.96237	98.6402	1765	21	1741	25	1976	26	124.1	3.8	83.4	2	78.6	1.5
Z16-35 - 27	0.1247	0.00065	0.3629	0.00265	6.233	0.055	0.94411	98.6263	2023.8	18	1996	25	1730	18	73.4	3.8	136.6	6	113.5	3.2
Z16-35 - 34	0.11465	0.0006	0.3317	0.00255	5.23	0.05	0.92262	98.5855	1873.5	19	1847	25	1839.9	16	694	50	304.1	9.1	240	16
Z16-35 - 137	0.12591	0.00065	0.3662	0.0025	6.264	0.055	0.71871	98.5642	2040.7	19	2011.4	23	1993.7	15	350	21	208	14	193.1	7.6
Z16-35 - 21	0.12447	0.00065	0.3618	0.00355	6.204	0.07	0.93425	98.4953	2020.4	19	1990	34	1830	41	447	13	137.8	7.7	41.5	1.1
Z16-35 - 59	0.14101	0.00075	0.4079	0.00325	7.911	0.075	0.89043	98.4903	2238.8	19	2205	30	918	14	1440	44	122	12	54	2.9
Z16-35 - 50	0.12095	0.00065	0.3509	0.0026	5.808	0.055	0.92723	98.4514	1969.5	19	1939	25	1713	22	325	12	254	14	199	14
Z16-35 - 134	0.12415	0.00065	0.3602	0.00265	6.093	0.06	0.97067	98.3729	2015.8	18	1983	25	1323	22	795	48	95	18	69.4	4.1
Z16-35 - 144	0.11519	0.00075	0.3327	0.00275	5.209	0.05	0.82697	98.3528	1882	23	1851	27	1842.2	17	294	17	178.6	4.9	152	4.2
Z16-35 - 53	0.1136	0.0007	0.3273	0.0024	5.127	0.05	0.84472	98.2768	1857	22	1825	23	1993.6	17	255.5	4.5	113.6	2.3	123.6	4.1
Z16-35 - 158	0.12315	0.00065	0.3567	0.00345	5.957	0.07	0.94819	98.2763	2001.5	19	1967	33	1900.6	16	361	28	122.8	7.8	104.9	4.5
Z16-35 - 143	0.2217	0.0013	0.5777	0.0055	17.41	0.175	0.855	98.2286	2992	19	2939	43	1947.4	16	183	11	132.6	7.6	121.8	4.6
Z16-35 - 43	0.12414	0.00065	0.3595	0.0024	6.125	0.05	0.92214	98.214	2015.7	18	1979.7	23	2112	19	205	15	88.5	6.3	104.6	3.8
Z16-35 - 2	0.11737	0.00065	0.3389	0.00335	5.49	0.07	0.97603	98.1733	1916	20	1881	32	1741	37	117.3	6.9	99.6	8.9	84.4	9.1
Z16-35 - 114	0.12194	0.00065	0.3522	0.0028	5.86	0.055	0.89113	98.0392	1983.9	19	1945	27	1197	31	666	60	185	20	130	20
Z16-35 - 111	0.11393	0.00065	0.3273	0.00295	5.083	0.055	0.92349	98.0024	1862.2	20	1825	29	1546	16	313.7	9.2	276.5	7.9	165	7.7
Z16-35 - 136	0.11445	0.0006	0.3279	0.00255	5.118	0.05	0.89091	97.7331	1870.4	19	1828	25	1751	18	301	26	394	33	339	22
Z16-35 - 107	0.12393	0.0007	0.3568	0.0042	6.01	0.09	0.98534	97.7294	2012.7	20	1967	40	1853	20	306.1	4.6	446.7	7.9	316.7	9.1
Z16-35 - 104	0.10966	0.00055	0.312	0.0023	4.669	0.0425	0.89481	97.6072	1792.9	19	1750	23	1690	19	101.5	7.7	108.2	6.1	86.3	2.8
Z16-35 - 58	0.14131	0.00075	0.4042	0.0033	7.854	0.075	0.94227	97.5697	2242.5	18	2188	30	1759	22	316	16	227	12	152.4	7.1
Z16-35 - 35	0.11166	0.00065	0.3181	0.0024	4.89	0.0465	0.91642	97.4808	1826	20	1780	23	1958	23	455	21	189.5	6.3	201.1	7.1
Z16-35 - 139	0.11101	0.00065	0.3156	0.0025	4.801	0.045	0.80088	97.4105	1815	22	1768	24	1713.2	15	1193	15	385	78	137.2	2.9
Z16-35 - 23	0.10793	0.0006	0.3041	0.0023	4.54	0.0415	0.86455	97.0522	1764	21	1712	23	1337.6	14	658	46	136.2	3.6	73.2	3
Z16-35 - 94	0.19425	0.001	0.5178	0.004	13.74	0.125	0.96807	96.8427	2777.7	16	2690	34	1683	31	460	26	44.2	1.1	37.5	2.7
Z16-35 - 126	0.12301	0.00075	0.3498	0.0025	5.849	0.055	0.65926	96.6983	1999	22	1933	24	1868.8	14	175.6	4.3	260.9	6.9	166.4	5.1
Z16-35 - 41	0.11462	0.0006	0.3242	0.0023	5.124	0.0445	0.82223	96.6364	1873	19	1810	23	1040	20	1425	25	268	19	119.8	3.2
Z16-35 - 17	0.1199	0.00095	0.3398	0.0047	5.62	0.11	0.9928	96.5182	1953	29	1885	45	1866.7	16	307	12	311.7	6.6	286.4	5.4
Z16-35 - 10	0.11549	0.00065	0.3263	0.00305	5.203	0.06	0.99176	96.4698	1886.6	20	1820	30	1898	22	419	12	267	14	241	20
Z16-35 - 88	0.10614	0.00055	0.2959	0.00225	4.307	0.0385	0.77365	96.4001	1733.4	19	1671	23	1542	15	648	27	89	6.8	54.6	3
Z16-35 - 112	0.1824	0.0012	0.49	0.006	12.2	0.2	0.99478	96.0359	2674	22	2568	52	1975	16	791	22	117.5	3.9	102.7	2.3
Z16-35 - 33	0.12559	0.00065	0.3538	0.0024	6.111	0.055	0.95039	95.8847	2036.3	18	1952.5	23	1620	19	747	31	621	19	490	12
Z16-35 - 51	0.11524	0.0006	0.323	0.0025	5.138	0.05	0.91616	95.8198	1882.7	19	1804	24	1747.8	16	166.7	3.5	144.1	4.5	116.1	3.4
Z16-35 - 95	0.11352	0.0006	0.3174	0.00225	4.914	0.041	0.82917	95.7482	1855.7	19	1776.8	22	2169.6	15	147	6.8	172.6	8.1	179.2	5.2
Z16-35 - 130	0.12263	0.0007	0.3445	0.0032	5.771	0.055	0.91344	95.6919	1993.9	20	1908	31	2049.3	15	275	14	118.6	6.1	112.9	3.9
Z16-35 - 159	0.129	0.0008	0.3622	0.00315	6.328	0.07	0.9056	95.6313	2083	22	1992	30	1831	20	195	17	243	29	219	24
Z16-35 - 73	0.12093	0.00065	0.3392	0.0026	5.613	0.055	0.97413	95.6274	1969.1	18	1883	25	1698	22	631	20	237.4	9.9	182.1	6.5
Z16-35 - 115	0.13668	0.0007	0.3827	0.00275	7.143	0.06	0.97512	95.6152	2184.8	17	2089	25	1785	17	546	15	280.1	6.2	209.6	6.6
Z16-35 - 82	0.1094	0.0009	0.3032	0.00465	4.52	0.095	0.98959	95.5232	1787	29	1707	46	1842	29	267	18	204	17	142	10
Z16-35 - 63	0.1195	0.00095	0.335	0.007	5.49	0.15	0.99419	95.4802	1947	29	1859	67	1942	17	341	13	216.1	9.9	187.5	9.3
Z16-35 - 5	0.11129	0.00055	0.3093	0.0024	4.746	0.045	0.97194	95.4553	1819.7	18	1737	24	2129.3	16	963	62	738	28	743	23
Z16-35 - 74	0.1087	0.0009	0.2992	0.00285	4.465	0.055	0.80154	94.9353	1777	29	1687	29	2259	18	114.6	4.8	103.9	2.7	102.8	1.9
Z16-35 - 140	0.10794	0.00055	0.2965	0.0023	4.339	0.039	0.92824	94.8926	1764.1	19	1674	23	1636	17	1315	55	3630	230	2065	66
Z16-35 - 7	0.10676	0.0007	0.292	0.00255	4.286	0.0495	0.89629	94.6674	1744	24	1651	25	2013.4	15	306.9	6.3	183.1	3.1	167.7	6.4
Z16-35 - 54	0.1098	0.0006	0.3008	0.0026	4.528	0.049	0.97828	94.4237	1795.1	20	1695	26	1942	17	476	45	217	25	155	11
Z16-35 - 65	0.12287	0.00075	0.3389	0.00375	5.69	0.075	0.95029	94.1913	1997	22	1881	36	1773.2	16	330	12	81.2	6.4	63.9	3.8
Z16-35 - 99**	0.12509	0.00065	0.3451	0.00405	5.89	0.08	0.97667	94.175	2029.2	18	1911	39	1148	68	260	14	95	5.3	64.2	2.2
Z16-35 - 109	0.10912	0.0006	0.2974	0.00285	4.429	0.0485	0.9448	94.0688	1783.8	20	1678	29	2029.9	17	333	14	144.8	4.3	129.5	2.9
Z16-35 - 66	0.12076	0.00065	0.3318	0.0025	5.501	0.05	0.94523	93.9137	1966.7	19	1847	24	1403	23	822	49	232.1	6.7	194.23	0.97
Z16-35 - 138	0.1226	0.00085	0.337	0.0047	5.62	0.105	0.98547	93.8816	1994	24	1872	45	2434.7	16	449	17	172.7	7.8	200.4	5.4
Z16-35 - 71	0.12454	0.00065	0.342	0.0023	5.838	0.049	0.81169	93.8013	2021.4	18	1896.1	22	1784.9	16	86.5	3.9	164.4	6.6	127	3.4
Z16-35 - 128	0.1193	0.00075	0.3273	0.00355	5.32	0.08	0.97654	93.7821	1946	23	1825	34	1991.8	15	696	18	354	32	310	33
Z16-35 - 32	0.10838	0.0006	0.2934	0.0032	4.381	0.06	0.98326	93.6194	1771	21	1658	32	1726	45	435	18	466	24	119.3	5.3
Z16-35 - 64	0.116	0.00145	0.3163	0.0023	5.05	0.07	0.01133	93.608	1893	45	1772	22	1359	17	417	19	135	15	34.64	0.96
Z16-35 - 14	0.12128	0.0006	0.3316	0.0024	5.546	0.0485	0.93923	93.4968	1974.4	18	1846	23	2060	36	274	50	149	19	138	11
Z16-35 - 103	0.12032	0.00065	0.3282	0.0025	5.397	0.05	0.95794	93.3578	1960.2	19	1830	24	2027	17	449	13	113.6	2.5	101.1	2.1
Z16-35 - 166	0.11931	0.00065	0.3251	0.0025	5.28	0.0495	0.92895	93.3114	1945.1	19	1815	24	1678	24	2499	52	2730	370	1048	38
Z16-35 - 28	0.12055	0.0007	0.3282	0.00425	5.45	0.085	0.99442	93.1737	1963	20	1829	41	1442	18	462.3	4.9	238	19	197	14
Z16-35 - 16	0.12636	0.00065	0.3436	0.00265	5.995	0.055	0.9118	93.0051	2047.2	18	1904	25	1551	17	708	63	189	13	116.2	7.6
Z16-35 - 11	0.1173	0.00095	0.3181	0.004	5.15	0.095	0.99688	92.9504	1915	29	1780	39	1734	47	404	13	92	12	62	12
Z16-35 - 120	0.12469	0.00065	0.3386	0.00275	5.745	0.065	0.97241	92.9037	2023.6	18	1880	27	1885	21	538	10	89.1	1.5	72.9	2.5
Z16-35 - 117	0.1116	0.00065	0.3001	0.0023	4.593	0.0455	0.88904	92.7123	1825	21	1692	23	2005	19	231.3	9.8	164.3	5.1	140.7	3.5
Z16-35 - 123	0.12437	0.0007	0.3367	0.0036	5.71	0.08	0.98907	92.6696	2019	20	1871	35	1892	27	343	13	98	6	78.3	5.1
Z16-35 - 48	0.11248	0.00055	0.3015	0.0028	4.661	0.05	0.98624	92.3922	1838.9	18	1699	28	1945	23	1025	91	1023	87	1034	89
Z16-35 - 152	0.1169	0.0008	0.314	0.006	4.98	0.115	0.99678	92.2956	1908	24	1761	57	1785	21	546	15	270	19	290	23
Z16-35 - 3	0.11885	0.0006	0.317	0.0023	5.204	0.047	0.93038	91.5845	1938.1	18	1775	23	1722	52	462	14	211	18	205	23
Z16-35 - 168	0.11707	0.00065	0.311	0.00325	4.938	0.06	0.95932	91.3134	1911	21	1745	32	1662.9	16	582	16	459	10	351.8	8.6
Z16-35 - 151	0.1195	0.0008	0.3168	0.0042	5.15	0.09	0.98369	91.0678	1948	24	1774	41	2220.8	17	166	5.2	207.9	7.2	219.2	6.1
Z16-35 - 49	0.1121	0.0009	0.2953	0.0046	4.57	0.105	0.91006	90.9934	1832	28	1667	46	1955.3	16	342.2	7.9	148	4.7	130.2	6.4
Z16-35 - 56	0.09045	0.0005	0.2241	0.0023	2.787	0.038	0.99303	90.9344	1434	22	1304	24	1698	18	225.1	8.7	375	16	248.7	8.8
Z16-35 - 113	0.1267	0.0014	0.33511	0.0022	5.79	0.08	0.53325	90.8386	2051	37	1863.1	21	1918	35	340	24	195.1	4.3	175.2	4.4
Z16-35 - 80	0.1156	0.001	0.305	0.006	4.83	0.125	0.98076	90.7309	1888	32	1713	61	1814	25	132	10	163	13	135.9	9.2
Z16-35 - 22	0.11504	0.00065	0.3028	0.00255	4.801	0.055	0.96242	90.7108	1879.6	20	1705	25	1854	18	82.3	2.4	124.9	3.1	113.5	2.6
Z16-35 - 129	0.1149	0.001	0.3023	0.0037	4.73	0.09	0.97787	90.6766	1877	31	1702	37	1859.5	16	176	7.1	180.3	7.2	149.8	2.9
Z16-35 - 25	0.1219	0.00075	0.3217	0.0028	5.405	0.065	0.96055	90.6707	1983	22	1798	27	1694.7	15	653.1	6.2	585	32	433	25
Z16-35 - 124	0.11441	0.00065	0.299	0.0026	4.658	0.06	0.98867	90.1604	1870	21	1686	26	1808	27	400	23	324	16	260	7.9
Z16-35 - 164	0.1101	0.00095	0.2847	0.0037	4.25	0.08	0.99619	89.7721	1799	32	1615	37	1918	17	396	22	87	8.3	80.5	6.7
Z16-35 - 119	0.13164	0.00075	0.3418	0.0024	6.124	0.06	0.86623	89.4431	2119	20	1895.3	23	1740.6	12	147	12	172	12	129.7	6.7
Z16-35 - 29	0.1176	0.0008	0.3047	0.00365	4.94	0.08	0.98115	89.3174	1919	24	1714	36	1786.6	14	305.4	9.2	378	12	344.2	7.1
Z16-35 - 161	0.1074	0.00125	0.2746	0.0046	4.01	0.105	0.9827	89.1168	1755	43	1564	46	1830.6	15	312.9	9	301	16	258	18
Z16-35 - 132	0.11616	0.00065	0.2998	0.0023	4.734	0.046	0.94904	89.088	1897	20	1690	23	2044.7	16	270	13	205.9	9.5	193.7	5.4
Z16-35 - 142	0.1545	0.0008	0.3912	0.0032	8.255	0.08	0.93463	88.8332	2395.5	18	2128	29	1750	40	226	17	331	35	243	32
Z16-35 - 116	0.11292	0.00065	0.2874	0.00295	4.406	0.06	0.95594	88.1907	1846	21	1628	30	2041	73	350	10	56.9	1.7	61.4	3.3
Z16-35 - 4	0.11108	0.00065	0.2813	0.00275	4.31	0.05	0.96291	87.9956	1816	21	1598	27	1761.6	15	230	17	340	27	286	17
Z16-35 - 20	0.1361	0.0025	0.345	0.008	6.5	0.265	0.99583	87.908	2175	64	1912	79	1342	94	192	53	54.1	2.3	40.9	1.1
Z16-35 - 156	0.1026	0.00095	0.2556	0.003	3.56	0.07	0.98935	87.8443	1670	34	1467	31	1828	23	669	64	588	86	564	60
Z16-35 - 84	0.1209	0.0008	0.306	0.006	5.08	0.12	0.99653	87.5	1968	23	1722	59	1613	18	321	13	58.9	2	40.81	0.59
Z16-35 - 30	0.1203	0.0008	0.3047	0.0028	5.049	0.06	0.88435	87.449	1960	24	1714	28	2733.7	19	264.1	2.8	96.8	1.1	133	3.6
Z16-35 - 24	0.2192	0.00155	0.497	0.01	15.05	0.38	0.99446	87.4243	2974	23	2600	88	1600.8	16	292	22	239	18	222	12
Z16-35 - 19	0.11725	0.00065	0.2963	0.0023	4.801	0.0485	0.89323	87.4131	1913.9	19	1673	23	2040.8	17	248	16	230	22	218	18
Z16-35 - 91**	0.09718	0.00065	0.2358	0.002	3.138	0.0375	0.91092	86.9427	1570	24	1365	21	1634	44	790	16	716	65	493	49
Z16-35 - 108	0.1435	0.00095	0.3576	0.00285	7.004	0.07	0.86938	86.8665	2269	23	1971	27	1843	32	638	13	168	13	136.6	9.8
Z16-35 - 13	0.1147	0.00135	0.286	0.005	4.54	0.13	0.99566	86.5456	1873	42	1621	51	1800.4	16	334	12	167.4	7	137.2	3.3
Z16-35 - 153	0.10778	0.00065	0.2661	0.00205	3.896	0.043	0.96179	86.3714	1761	23	1521	21	2063.9	16	278	17	217.7	3.2	217.2	7.1
Z16-35 - 60**	0.1182	0.00075	0.2947	0.00245	4.802	0.06	0.9625	86.3589	1928	23	1665	25	1810	16	130.2	1.9	109.7	3.2	88.8	3.4
Z16-35 - 110	0.1079	0.00075	0.2663	0.00325	3.875	0.0475	0.97667	86.3301	1763	25	1522	33	1907.7	15	788	46	267	17	275	17
Z16-35 - 98	0.12251	0.0007	0.3057	0.0021	5.123	0.047	0.96948	86.3166	1992.2	20	1719.6	21	1808	21	205.5	8.1	185.3	6.6	161.3	6.2
Z16-35 - 83	0.0925	0.00175	0.219	0.0095	2.79	0.17	0.99598	86.2772	1472	74	1270	100	1814	40	305.9	8.1	167.5	4.5	139.4	4.5
Z16-35 - 87	0.10714	0.0006	0.2624	0.00205	3.839	0.0385	0.96474	85.8286	1750	21	1502	21	1541	31	766	14	234	23	182	14
Z16-35 - 96	0.11527	0.0007	0.284	0.007	4.49	0.12	0.9925	85.6081	1883	23	1612	70	1865.5	16	275	10	179.5	7	159	4.3
Z16-35 - 45	0.11423	0.0006	0.2795	0.0026	4.405	0.039	0.97778	85.1144	1866.9	19	1589	26	1608	20	596	77	66.9	4.5	51.6	3.5
Z16-35 - 131	0.09415	0.0005	0.2192	0.0019	2.815	0.031	0.95424	84.6189	1510.3	20	1278	20	1808.7	16	907	38	360	29	197.7	8.5
Z16-35 - 47	0.11033	0.00065	0.2643	0.00215	4.011	0.043	0.95629	83.8137	1804	21	1512	22	2618	31	279	10	154	12	195	12
Z16-35 - 141	0.11502	0.0007	0.2767	0.0028	4.329	0.06	0.96992	83.768	1879	22	1574	28	1760	19	283.2	6.6	401	8.9	321	5.5
Z16-35 - 77	0.11258	0.0006	0.2682	0.00255	4.144	0.0395	0.95585	83.1794	1840.6	20	1531	26	1725.8	16	220	11	202.1	9.9	158	4.6
Z16-35 - 93	0.116	0.00125	0.279	0.0065	4.47	0.145	0.97912	83.1673	1907	45	1586	63	1875.9	15	483	10	490	19	473	15
Z16-35 - 72	0.1305	0.0014	0.3118	0.003	5.55	0.07	0.47468	83.1669	2103	38	1749	30	1703.4	18	450	28	495	39	412	26
Z16-35 - 150	0.13785	0.00075	0.3278	0.00265	6.141	0.065	0.97009	83.106	2199.6	19	1828	26	2214.2	17	158	11	71.8	4.7	76.1	3.7
Z16-35 - 76	0.1185	0.00095	0.2823	0.00345	4.59	0.085	0.98782	82.971	1932	28	1603	34	1854	17	75.2	4.5	115.7	5.8	98.5	3.7
Z16-35 - 55	0.12556	0.00065	0.2989	0.0026	5.206	0.05	0.90705	82.8135	2035.9	19	1686	26	1566	19	559	45	260	24	102.2	1.8
Z16-35 - 86	0.09406	0.000485	0.2118	0.0018	2.734	0.026	0.98271	82.0737	1508.4	19	1238	19	1642	21	626	26	103.2	4	68.8	3.1
Z16-35 - 1	0.12544	0.0007	0.2938	0.00485	5.08	0.085	0.98581	81.6086	2034.1	20	1660	48	1833	28	282	32	449	66	391	57
Z16-35 - 39**	0.12573	0.00065	0.2823	0.00355	4.89	0.065	0.99179	78.644	2038.3	18	1603	36	1884.3	16	332	21	159.8	5.8	141	4.2
Z16-35 - 106	0.08119	0.00049	0.161	0.00195	1.785	0.027	0.98615	78.5306	1225	24	962	21	1783	24	139.4	9	121	11	95	10
Z16-35 - 102	0.1165	0.00165	0.2604	0.00315	4.15	0.1	0.97553	78.485	1901	51	1492	32	1775.2	16	535	21	455	15	353	10
Z16-35 - 40	0.09546	0.00055	0.2037	0.0027	2.684	0.04	0.95654	77.7944	1536.1	21	1195	29	1795	18	935	28	560	17	301	14
Z16-35 - 15	0.10959	0.00065	0.2381	0.0021	3.585	0.037	0.90548	76.8415	1792	21	1377	22	2090.1	17	185	11	55.3	1.7	54.95	0.79
Z16-35 - 37	0.129	0.00065	0.2782	0.00235	4.938	0.047	0.96856	75.9299	2083.5	18	1582	24	1884	43	453.8	6.3	233.8	4.1	103.9	6.1
Z16-35 - 101	0.1357	0.00195	0.2908	0.00365	5.4	0.135	0.86923	75.7715	2171	51	1645	36	1695	20	518	23	60.3	2.5	44	1.1
Z16-35 - 68	0.11142	0.00065	0.236	0.00185	3.609	0.039	0.9572	74.9726	1822	21	1366	19	1870.5	15	429.9	9.8	412	15	338	18
Z16-35 - 155	0.11845	0.00075	0.2511	0.0026	4.04	0.05	0.95249	74.7412	1932	23	1444	27	1893	47	215.7	7.3	138	27	113	18
Z16-35 - 75	0.12088	0.00065	0.2547	0.00355	4.22	0.06	0.9839	74.3243	1968.4	20	1463	36	2957	19	254	12	181.1	7.7	242.2	8.4
Z16-35 - 105	0.1304	0.0008	0.2724	0.00305	4.86	0.055	0.98114	73.882	2102	22	1553	31	2062	18	273	11	73.1	2.7	66.5	2.5
Z16-35 - 133**	0.10458	0.00065	0.2094	0.00235	2.982	0.0445	0.99074	71.864	1706	23	1226	25	1800	23	1188	91	531	37	384	13
Z16-35 - 121	0.11652	0.00065	0.2319	0.00255	3.677	0.043	0.89553	70.6402	1902.6	20	1344	27	1797	17	282	12	269.2	7.5	220.4	3
Z16-35 - 18	0.095	0.00195	0.1751	0.00295	2.254	0.05	0.51301	68.3761	1521	77	1040	32	1787	45	208	23	39.2	4.7	32.9	4.2
Z16-35 - 97	0.12367	0.0007	0.2324	0.00245	3.932	0.047	0.95303	67.0483	2009	19	1347	26	1766.5	14	219.8	8.1	288.1	4.6	244.7	3.9
Z16-35 - 148	0.11786	0.0007	0.221	0.00155	3.54	0.0315	0.53272	66.9423	1923	22	1287.3	17	1853.4	17	237	13	436	31	269	29
Z16-35 - 169	0.0952	0.0015	0.164	0.0095	2.07	0.1	0.97063	64.1361	1528	58	980	100	1875	19	201.9	3.2	995	14	888	20
Z16-35 - 157	0.1234	0.0009	0.2129	0.00205	3.566	0.033	0.73003	62.0449	2005	25	1244	22	1930	22	192	17	123.6	9.1	120.5	7.2
Z16-35 - 125	0.08344	0.00049	0.1295	0.0014	1.47	0.017	0.90091	61.3761	1279	23	785	16	1827	20	377	35	301	54	264	34
Z16-35 - 154	0.1791	0.00215	0.2607	0.00425	6.35	0.17	0.99204	56.4888	2643	40	1493	43	1105.1	13	919	52	543	29	93.3	4.8
Z16-35 - 62	0.112	0.0008	0.1281	0.0015	1.97	0.019	0.91261	42.4127	1832	26	777	17	1772	32	242.8	6.7	86.4	2	67.1	1.8
Z16-33 - 22	0.05703	0.00036	0.07822	0.0006	0.6219	0.006	0.71542	98.8798	491	28	485.5	7	842	47	965	16	1610	450	195	28
Z16-33 - 7	0.05963	0.00043	0.08133	0.0006	0.6759	0.007	0.44564	85.5857	589	31	504.1	7.1	582	32	705	45	129.6	8.7	53	11
Z16-33 - 27	0.0594	0.0008	0.078	0.0006	0.644	0.011	0.78839	83.8995	577	58	484.1	7.1	675	29	909	37	1173	31	275.1	8.1
Z16-33 - 35	0.05982	0.000435	0.07857	0.00055	0.653	0.0075	0.75034	81.9496	595	32	487.6	6.6	803.6	11	1417	97	693	70	266	17
Z16-33 - 21	0.0617	0.00095	0.08076	0.0006	0.693	0.0105	-0.46443	76.0942	658	59	500.7	7.4	1004	30	806	35	381	37	205	11
Z16-33 - 24	0.06212	0.000385	0.07705	0.0006	0.6666	0.007	0.87598	70.6795	677	27	478.5	7.3	535.3	11	979	42	236.1	9.1	58.9	3.1
Z16-33 - 2	0.0681	0.0023	0.08166	0.00065	0.775	0.0285	0.50694	58.8372	860	130	506	7.6	524.2	8.6	672	23	81.3	2.7	24.5	1
Z16-33 - 8	0.0648	0.0017	0.0714	0.0009	0.648	0.0135	-0.74455	58.5132	760	100	444.7	11	507	16	976	42	162	10	41	5.9
Z16-33 - 6	0.0663	0.001	0.07525	0.0006	0.694	0.0095	-0.4693	57.7407	810	62	467.7	7.4	1326	41	2000	81	680	69	830	69
Z16-33 - 28	0.0711	0.00445	0.08401	0.0006	0.83	0.05	-0.53795	52	1000	260	520	7.1	1181	18	1207	67	2280	170	510	19
Z16-33 - 25	0.07167	0.0005	0.08162	0.00055	0.816	0.0085	0.34468	51.8769	975	30	505.8	6.4	750	52	683	32	147	17	88	12
Z16-33 - 14	0.071	0.0008	0.0724	0.00075	0.715	0.0135	0.91754	47.2327	954	44	450.6	9	861	14	1630	190	720	180	352	49
Z16-33 - 23	0.0775	0.0012	0.07656	0.00065	0.829	0.0175	0.72642	42.1543	1128	63	475.5	8	699	55	474	93	177.3	8.6	67.1	3.7
Z16-33 - 20	0.07146	0.00055	0.06394	0.0005	0.6409	0.006	0.034521	41.2281	969	30	399.5	6.1	547	16	762	41	123	11	40.1	4.6
Z16-33 - 29	0.0696	0.00065	0.05915	0.00042	0.576	0.0065	-0.33404	40.5252	914	39	370.4	5.1	1160	18	1670	120	756	59	577	17
Z16-33 - 13	0.0845	0.00415	0.0852	0.001	1	0.06	0.96589	39.6241	1330	190	527	12	724	42	3480	270	10300	1500	1050	170
Z16-33 - 34	0.094	0.008	0.08338	0.0007	1.09	0.1	0.95253	37.413	1380	320	516.3	8.6	847	19	1431	90	468	47	267.2	9.1
Z16-33 - 3	0.0883	0.0033	0.0775	0.00085	0.947	0.0285	-0.90141	35.3676	1360	140	481	9.9	839	43	871	30	810	120	197	18
Z16-33 - 32	0.096	0.0018	0.0744	0.00095	0.981	0.0135	0.30265	29.9806	1544	69	462.9	11	524.7	10	759	28	790	130	91.3	6.8
Z16-33 - 4	0.1095	0.0008	0.07927	0.00055	1.207	0.012	-0.20173	27.4595	1791	27	491.8	6.5	502.8	7.6	995	48	221	12	56.6	2.6
Z16-33 - 19	0.0858	0.0018	0.0563	0.00135	0.677	0.0085	-0.42481	26.6214	1326	76	353	16	535	12	981	75	75.6	4.2	27.5	2.8
Z16-33 - 11	0.1105	0.0049	0.0717	0.0007	1.1	0.055	0.87212	25.073	1780	150	446.3	8.3	491	7.7	367	20	232.5	5.4	48.8	1.6
Z16-33 - 31	0.135	0.006	0.08192	0.00055	1.53	0.065	-0.25263	23.9387	2120	150	507.5	6.8	613	19	4540	420	610	100	347	11
Z16-33 - 17	0.1229	0.0011	0.0766	0.0011	1.305	0.0215	0.85549	23.8238	1998	32	476	13	518.6	8.8	567	7.8	942	23	225.9	3.4
Z16-33 - 1	0.13	0.0075	0.0726	0.0014	1.3	0.055	-0.9779	22.0488	2050	210	452	17	605.7	9.3	1374	67	315	19	94.2	3.1
Z16-33 - 18	0.131	0.0055	0.07091	0.00055	1.293	0.0485	-0.59101	21.2308	2080	150	441.6	6.8	1880	100	1560	350	39000	15000	1370	190
Z16-33 - 16	0.12	0.0085	0.0618	0.00205	1.049	0.0435	-0.91295	19.4472	1990	260	387	25	505	14	449	19	293	10	66.2	1.8
Z16-33 - 5	0.1599	0.0044	0.07597	0.0007	1.691	0.04	-0.63454	19.2889	2447	91	472	8.1	610	54	474	17	1426	30	330	12
Z16-33 - 30	0.1752	0.0023	0.07861	0.0006	1.906	0.023	0.27753	18.7183	2606	43	487.8	7.1	461.8	8.5	885	22	777	38	190.3	6.4
Z16-33 - 9	0.235	0.0075	0.0823	0.00075	2.7	0.075	-0.47796	16.5477	3082	98	510	8.7	1083	16	1328	42	1514	83	468	41
Z16-33 - 10	0.2195	0.00165	0.072	0.0008	2.2	0.0275	0.86712	15.0638	2976	24	448.3	9.8	937	53	741	45	1483	44	363	16
Z16-33 - 12	0.1631	0.0048	0.0593	0.00175	1.335	0.0155	0.11112	15.002	2473	97	371	21	694	14	989	36	252	57	116	8.5
Z16-33 - 26	0.452	0.006	0.089	0.0055	5.53	0.31	0.9835	13.3774	4089	39	547	66	1202	27	1429	66	1710	540	554	10
Z16-33 - 15	0.2492	0.00175	0.0621	0.001	2.134	0.0275	0.95804	12.2366	3179	22	389	12	735	95	780	22	436.3	7.9	166	30
Z16-33 - 33	0.2829	0.0029	0.0585	0.00105	2.269	0.042	0.81534	10.838	3377	32	366	13	510.5	9.2	682	28	107	14	28.4	2.8
Z16-27 - 29	0.12194	0.0006	0.3706	0.0027	6.256	0.055	0.95001	102.378	1984.8	16	2032	25	-9.21	0.35	522	11	514	30	-0.832201	8.2e-05
Z16-27 - 17	0.12201	0.00065	0.3653	0.0026	6.174	0.055	0.83695	101.113	1984.9	19	2007	25	-1.58	0.14	2910	250	3610	230	-0.835729	5.7e-05
Z16-27 - 27	0.12336	0.00065	0.3684	0.0033	6.271	0.065	0.97731	100.873	2004.5	19	2022	31	2130.9	17	259	16	88.7	4	93.8	2.4
Z16-27 - 2	0.1782	0.0009	0.5022	0.0035	12.36	0.105	0.86675	99.5295	2635.4	17	2623	30	1854	18	526	21	188	14	188	16
Z16-27 - 33	0.12607	0.0007	0.3709	0.0026	6.463	0.065	0.91698	99.5105	2043	20	2033	24	1952.8	15	446.2	7.1	231	14	229	18
Z16-27 - 13	0.13569	0.0007	0.3974	0.00285	7.44	0.065	0.97299	99.3048	2172.1	17	2157	26	1991	18	1029	43	185	11	215.7	6.4
Z16-27 - 25	0.12285	0.0006	0.3599	0.00255	6.108	0.055	0.95274	99.234	1997.3	18	1982	24	1834.9	17	2060	110	484	37	532	37
Z16-27 - 21	0.18237	0.00095	0.509	0.011	12.82	0.275	0.99932	99.1473	2673.8	17	2651	97	1978.8	15	1012	18	771	29	702	40
Z16-27 - 41	0.12256	0.0006	0.3569	0.00275	6.021	0.055	0.96371	98.6954	1993	18	1967	26	1972	29	1150	110	99.8	5.8	192	9.6
Z16-27 - 6	0.12037	0.0007	0.3495	0.0033	5.818	0.065	0.924	98.5212	1961	20	1932	31	2315	43	1680	170	347	24	546	21
Z16-27 - 37	0.12376	0.00065	0.3576	0.00345	6.108	0.065	0.9844	98.0451	2010.3	18	1971	33	1972.9	17	184.4	5.8	192	4.5	188.6	4.6
Z16-27 - 5	0.12255	0.0007	0.3538	0.0026	5.981	0.06	0.85349	98.0028	1992.8	20	1953	25	1949	19	574	41	707	61	737	46
Z16-27 - 39**	0.12675	0.00065	0.3656	0.0025	6.378	0.055	0.79126	97.8709	2052.5	18	2008.8	23	2147	31	805	17	558.4	7.6	578	21
Z16-27 - 34	0.12168	0.0006	0.3472	0.00235	5.843	0.05	0.93556	97.0256	1980.2	18	1921.3	23	1823.5	15	1086	68	162.5	6.9	186.8	2.9
Z16-27 - 9	0.13524	0.0007	0.3839	0.00295	7.156	0.07	0.88006	96.6625	2166.3	19	2094	28	2029.1	15	336	13	336	22	337	21
Z16-27 - 38	0.12298	0.00065	0.3468	0.0024	5.881	0.05	0.86538	96.003	1999	18	1919.1	23	1813	30	3830	140	713	90	625	72
Z16-27 - 16	0.12244	0.0007	0.3449	0.00295	5.83	0.065	0.97265	95.9317	1991	20	1910	28	2165.7	16	1299	81	335	12	356	10
Z16-27 - 36	0.12597	0.00065	0.3541	0.0024	6.167	0.05	0.8613	95.7092	2041.6	18	1954	23	2631	35	468	12	274	6	404	11
Z16-27 - 3	0.12742	0.0007	0.3578	0.00285	6.283	0.06	0.91535	95.6399	2061.9	19	1972	27	2014	19	290.5	7.5	103.6	2.5	111.5	4.4
Z16-27 - 4	0.1207	0.00105	0.334	0.008	5.59	0.17	0.99542	94.6029	1964	33	1858	79	1999.7	15	346	29	203	17	212	13
Z16-27 - 22	0.12205	0.00065	0.3312	0.0036	5.59	0.07	0.9911	92.8687	1985.6	19	1844	35	1914	21	270	17	191	12	205.5	6.1
Z16-27 - 20	0.12863	0.00065	0.3447	0.0024	6.128	0.05	0.96409	91.8599	2078.6	18	1909.4	23	2632	16	157.9	6.5	95.2	2.4	131.4	2.2
Z16-27 - 19	0.1561	0.001	0.406	0.008	8.79	0.2	0.99925	91.0485	2413	22	2197	72	1958.4	15	1600	110	339	22	345	12
Z16-27 - 24	0.11864	0.00065	0.3033	0.00495	4.97	0.09	0.99519	88.2171	1935	19	1707	49	1697	17	2460	180	299	12	362.3	8.2
Z16-27 - 14	0.11985	0.00065	0.2981	0.00215	4.958	0.045	0.93291	86.1195	1953.1	19	1682	21	2015.9	17	376.9	9	248.5	5.4	281.8	8.4
Z16-27 - 8	0.09624	0.000495	0.2282	0.0024	3.016	0.0335	0.97287	85.3957	1551.6	19	1325	25	1950	20	1395	83	461	41	517	26
Z16-27 - 12	0.1257	0.00075	0.307	0.0085	5.32	0.145	0.99144	84.4455	2038	22	1721	83	1812	15	1790	100	652	15	697	16
Z16-27 - 10	0.11424	0.0006	0.2738	0.00235	4.32	0.0435	0.97805	83.5565	1867	19	1560	24	2012.2	15	1004	72	336	31	401	22
Z16-27 - 28**	0.12401	0.00065	0.2971	0.00265	5.094	0.05	0.98193	83.2713	2013.9	18	1677	26	1868	47	652	23	296	25	335	25
Z16-27 - 23	0.12354	0.00065	0.2941	0.00235	5.025	0.045	0.95165	82.8019	2007.2	18	1662	23	1744	67	880	150	297	26	357	29
Z16-27 - 7	0.2236	0.0013	0.463	0.0075	14.31	0.26	0.98608	81.5675	3006.1	19	2452	68	1734	46	1284	87	820	120	559	31
Z16-27 - 26	0.1377	0.00085	0.3126	0.00445	5.93	0.105	0.98591	79.7906	2197	21	1753	44	2040.6	17	273	18	205	19	227	12
Z16-27 - 40	0.13013	0.0007	0.2881	0.0033	5.211	0.055	0.94373	77.755	2098.9	20	1632	33	1909	55	221	14	144	21	155	19
Z16-27 - 35	0.15674	0.00085	0.337	0.006	7.29	0.13	0.9912	77.3554	2420	18	1872	59	1991.4	15	614	49	241	15	232	11
Z16-27 - 18	0.12684	0.00075	0.258	0.006	4.53	0.125	0.99857	72.0058	2054	21	1479	63	1415	19	2880	150	249	14	277.2	7.4
Z16-27 - 11	0.12776	0.0007	0.256	0.0105	4.52	0.175	0.99954	71.1382	2066.4	20	1470	110	2768	35	145.2	5.3	67.3	3.4	115.4	2.8
Z16-27 - 30	0.2281	0.0025	0.3943	0.00375	12.38	0.225	0.88124	70.5863	3036	36	2143	35	1489	83	2260	440	49	14	161	36
Z16-27 - 15	0.11903	0.0006	0.205	0.0105	3.37	0.17	0.99987	61.827	1940.9	18	1200	110	2665	43	1020	170	459	74	770	86
Z16-27 - 1	0.151	0.0017	0.148	0.005	3.03	0.065	0.99852	37.7759	2356	39	890	57	2000.7	15	185.7	3.8	77.4	3.3	81.9	2.1
Z16-27 - 31	0.61757	0.003	-1.82e-05	8e-07	-0.00155	7e-05	0.99848	-0.00257186	4549.24	14	-0.117	0.01	1994.2	15	941	23	821	30	874	39
Z16-27 - 32	0.618492	0.00305	-0.0001058	1.95e-06	-0.00903	0.000175	0.99999	-0.0149844	4551.4	14	-0.682	0.025	1426	38	2820	160	1353	58	972	14
Z16-26 - 23	0.1382	0.00075	0.434	0.005	8.29	0.115	0.98602	105.449	2203.9	19	2324	46	2020	25	275	72	112	16	113	14
Z16-26 - 16	0.1251	0.00065	0.38	0.00275	6.568	0.055	0.89581	102.296	2029.4	18	2076	26	1928.2	15	329	16	102.5	7.2	97.8	3.6
Z16-26 - 14	0.13062	0.00065	0.3879	0.0026	6.997	0.06	0.93592	100.361	2105.5	17	2113.1	24	1585	69	635	91	143	11	160	13
Z16-26 - 20	0.18138	0.0009	0.5114	0.00345	12.805	0.11	0.96011	99.9174	2664.7	17	2662.5	29	1995.4	15	420.3	8.7	184.7	3.4	158.4	7.7
Z16-26 - 8	0.12537	0.00065	0.369	0.0026	6.397	0.055	0.94349	99.5918	2033.3	18	2025	24	1999	18	303.5	8.6	120.8	5.2	118.9	5.7
Z16-26 - 13	0.13347	0.0007	0.3862	0.0026	7.141	0.06	0.82005	98.2316	2143.2	18	2105.3	24	2031.9	15	661	28	171	10	167.9	7.8
Z16-26 - 10	0.12559	0.00065	0.3635	0.00455	6.32	0.09	0.98587	98.1191	2036.3	19	1998	43	1540	75	1330	74	193	14	191	18
Z16-26 - 5	0.12571	0.00065	0.3541	0.003	6.162	0.06	0.95636	95.8783	2038	18	1954	28	1927	77	261	17	144	40	132	25
Z16-26 - 12	0.12477	0.00075	0.3419	0.00335	5.94	0.06	0.89397	93.4911	2028	23	1896	32	1842	18	462	91	51	3.1	51	2.5
Z16-26 - 18	0.1504	0.0008	0.3953	0.00395	8.21	0.105	0.97793	91.3734	2349.7	18	2147	36	1945	17	284	6	98.3	2.4	130.6	4.3
Z16-26 - 11	0.13028	0.0007	0.3407	0.0024	6.136	0.055	0.86918	89.9614	2100.9	19	1890	23	1704	70	560	19	184	17	215.1	5.7
Z16-26 - 3	0.1254	0.0009	0.327	0.0145	5.71	0.255	0.98185	89.4789	2034	25	1820	140	1966.9	17	199	38	99	22	95	20
Z16-26 - 6	0.12568	0.00065	0.3268	0.00225	5.68	0.049	0.88339	89.4528	2037.5	19	1822.6	22	2129.1	15	304.9	9	115	2.4	118.1	2
Z16-26 - 21	0.13698	0.0008	0.3301	0.0033	6.267	0.07	0.96179	84.0494	2188	20	1839	32	2111	15	922	28	385	14	397	11
Z16-26 - 1	0.12398	0.0007	0.2997	0.0025	5.139	0.055	0.92185	83.9543	2013	20	1690	25	1759	29	1465	82	96.4	2.2	112.4	2.3
Z16-26 - 19	0.11997	0.0006	0.283	0.0065	4.7	0.11	0.99865	82.0972	1955	18	1605	66	2055	15	323	27	217	21	231	15
Z16-26 - 22	0.12407	0.00075	0.282	0.0085	4.83	0.135	0.9976	79.4045	2015	21	1600	84	1978	22	1026	73	127.9	7.8	211	15
Z16-26 - 15	0.12249	0.00065	0.2756	0.0047	4.66	0.08	0.99692	78.7651	1992	18	1569	48	2254	23	1041	68	426	18	595	25
Z16-26 - 9	0.13902	0.0007	0.3017	0.00265	5.793	0.06	0.96006	76.7285	2214.3	18	1699	26	1763	40	1111	33	186	21	187	17
Z16-26 - 17	0.1425	0.00095	0.3047	0.00305	5.98	0.085	0.94634	75.9415	2257	23	1714	30	2665.4	16	767	44	470	20	671	15
Z16-26 - 2	0.1377	0.0012	0.232	0.011	4.41	0.185	0.99312	61.02	2196	31	1340	120	2014	19	651	27	234	28	256	21
Z16-26 - 7	0.1288	0.0011	0.214	0.011	3.8	0.17	0.99892	60.0962	2080	31	1250	120	1807	36	2010	200	1760	110	1700	30
Z16-26 - 4	0.13	0.00135	0.196	0.0115	3.53	0.175	0.99984	54.8664	2096	36	1150	120	2263	25	850	100	750	180	840	140
Z16-17 - 5	0.1862	0.00095	0.1375	0.00215	3.55	0.06	0.99712	30.6488	2708.1	17	830	25	1537	27	1351	82	238	12	236.6	9.7
Z16-17 - 3	0.11484	0.00065	0.0561	0.00165	0.893	0.026	0.99245	18.7633	1876	21	352	20	647	28	2640	340	113	14	102.9	6.6
Z16-17 - 4	0.3632	0.00495	0.00542	0.00013	0.2716	0.0037	0.9765	0.927945	3761	41	34.9	1.7	243.9	5.9	23950	690	2270	140	1002	27
Z16-17 - 1	0.673176	0.0033	-2.35e-06	1.15e-07	-0.000217	1.15e-05	0.99088	-0.00032294	4675.79	15	-0.0151	0.0015	-0.22	0.023	20400	2400	14720	760	-0.795389	3.7e-05
Z16-17 - 2	0.66942	0.0033	-3.2e-06	8e-08	-0.000296	7.5e-06	1	-0.000441368	4667.31	15	-0.0206	0.001	-0.301	0.015	15420	320	5851	83	-0.797372	4.8e-05
Z_GJ1_1	0.06042	0.00071	0.09675	0.0013	0.8057	0.015	0.74792	95.8615	621	22	595.3	7.7	600	8.4	403	16	11.16	0.79	2.803	0.087
Z_GJ1_2	0.06018	0.00078	0.09739	0.0014	0.8063	0.016	0.50345	98.3744	609	28	599.1	8	600.4	9	456.8	5.9	12.72	0.93	3.18	0.13
Z_GJ1_3	0.05978	0.0007	0.09573	0.0014	0.7902	0.013	0.57722	99.2088	594	25	589.3	8.1	591.3	7.6	405	19	10.96	0.78	2.81	0.14
Z_GJ1_4	0.06011	0.00071	0.09605	0.0013	0.7935	0.014	0.57667	97.5578	606	25	591.2	7.5	593.1	8	398	18	10.6	1.2	2.807	0.064
Z_GJ1_5	0.0603	0.00071	0.09702	0.0013	0.8059	0.014	0.45473	97.3736	613	26	596.9	7.5	600.1	8.1	426	22	11.7	1.2	2.98	0.12
Z_GJ1_6	0.0596	0.00065	0.09622	0.0013	0.7921	0.014	0.63038	100.867	588	24	593.1	8.5	592.3	8.1	405	20	10.62	0.84	2.89	0.1
Z_GJ1_7	0.05995	0.00073	0.09763	0.0014	0.8049	0.014	0.56334	100.083	600	26	600.5	8.1	599.6	8.1	393	21	11.31	0.63	2.83	0.11
Z_GJ1_8	0.06018	0.00069	0.09718	0.0013	0.8066	0.014	0.57418	98.1773	609	25	597.9	7.5	600.5	7.9	406	17	12.2	1	2.782	0.086
Z_GJ1_9	0.05997	0.00074	0.09764	0.0013	0.8092	0.014	0.37171	99.9334	601	27	600.6	7.7	602	7.9	408	23	11.3	1.4	2.79	0.14
Z_GJ1_10	0.06	0.00069	0.09579	0.0013	0.7955	0.014	0.53567	97.9568	602	25	589.7	7.6	594.2	8.2	424	19	11.68	0.95	2.83	0.13
Z_GJ1_11	0.06012	0.00074	0.09868	0.0014	0.8226	0.014	0.51044	99.9506	607	27	606.7	7.9	609.5	8	413	21	9.84	0.77	2.88	0.15
Z_GJ1_12	0.0595	0.00069	0.09771	0.0013	0.8086	0.015	0.66857	102.911	584	25	601	7.9	601.7	8.2	434	20	9.3	1.1	3.12	0.12
Z_GJ1_13	0.05999	0.00076	0.09614	0.0013	0.8029	0.014	0.29904	98.289	602	28	591.7	7.8	598.4	8.2	383	23	9.9	1.1	2.62	0.11
Z_GJ1_14	0.06003	0.00087	0.09779	0.0013	0.8191	0.016	0.2665	99.7347	603	31	601.4	7.8	607.5	8.8	392	20	9.5	1.1	2.81	0.14
Z_GJ1_15	0.05987	0.00071	0.09814	0.0013	0.8176	0.015	0.53106	100.92	598	26	603.5	7.6	606.7	8.4	391	20	10.37	0.93	2.76	0.12
Z_GJ1_16	0.05993	0.00084	0.09527	0.0014	0.7922	0.015	0.52145	97.9299	599	30	586.6	8.1	592.4	8.5	375	25	10.1	1.4	2.57	0.14
Z_GJ1_17	0.05973	0.00078	0.09835	0.0014	0.8135	0.015	0.58738	102.162	592	28	604.8	8	604.4	8.5	385	24	9.88	0.68	2.59	0.13
Z_GJ1_18	0.05966	0.00079	0.09784	0.0014	0.8126	0.015	0.37853	101.983	590	29	601.7	8.1	603.9	8.2	391	19	9.9	1.2	2.806	0.082
Z_GJ1_19	0.06	0.00079	0.09784	0.0013	0.8143	0.016	0.53582	99.9502	602	28	601.7	7.9	604.8	8.8	404	17	10.3	1	2.784	0.075
Z_GJ1_20	0.0598	0.00072	0.09777	0.0013	0.809	0.015	0.63372	100.384	599	28	601.3	7.8	601.8	8.4	401	19	10.82	0.88	2.693	0.092
Z_GJ1_21	0.05999	0.00066	0.09746	0.0013	0.8107	0.014	0.5959	99.5847	602	24	599.5	7.7	602.8	7.8	391	17	10.1	1.3	2.656	0.088
Z_GJ1_22	0.06028	0.00068	0.09821	0.0014	0.8176	0.015	0.64996	98.6765	612	25	603.9	7.9	606.7	8.2	408	23	9.9	1	2.97	0.11
Z_GJ1_23	0.05966	0.00074	0.09719	0.0013	0.8014	0.016	0.75665	101.339	590	27	597.9	7.8	597.6	8.8	431	19	10.3	0.93	3.07	0.11
Z_GJ1_24	0.06026	0.00073	0.09737	0.0014	0.8092	0.015	0.52969	98.036	611	26	599	8	602	8.2	395	17	10.2	1.2	2.673	0.065
Z_GJ1_25	0.06005	0.00078	0.09672	0.0013	0.8009	0.014	0.30606	98.5265	604	28	595.1	7.7	597.3	8	395	19	11.05	0.98	2.65	0.1
Z_GJ1_26	0.06001	0.00078	0.09706	0.0013	0.8005	0.016	0.68883	99.186	602	28	597.1	7.7	597	8.8	398	24	10.5	1.3	2.81	0.11
Z_GJ1_27	0.06014	0.00078	0.09668	0.0013	0.7965	0.015	0.58296	98.0066	607	28	594.9	7.9	594.8	8.6	415	24	10.2	1	3.03	0.12
Z_GJ1_28	0.06041	0.0007	0.09746	0.0013	0.8049	0.014	0.32306	97.1637	617	25	599.5	7.6	599.6	7.8	427	20	11.9	1.2	3.031	0.091
Z_GJ1_29	0.05987	0.00072	0.09732	0.0013	0.7928	0.014	0.49782	100.285	597	26	598.7	7.7	592.7	8	413	14	11.6	1.1	2.92	0.12
Z_GJ1_30	0.06021	0.0008	0.09349	0.0013	0.7647	0.015	0.68887	94.459	610	29	576.2	7.7	577.9	8.2	409	21	10.8	1.1	2.894	0.087
Z_Plesovice_1	0.05337	0.00064	0.05145	0.00067	0.3794	0.0066	0.024209	94.3003	343	27	323.45	4.1	326.6	4.8	1084	43	138.5	3.8	20.78	0.23
Z_Plesovice_2	0.05314	0.00061	0.05377	0.00073	0.3938	0.007	0.69769	101.381	333	26	337.6	4.5	337.1	5.1	776	35	80.3	3.6	11.82	0.27
Z_Plesovice_3	0.05292	0.00061	0.05434	0.00072	0.3996	0.0069	0.36791	105.278	324	26	341.1	4.4	341.4	5	1142	26	115.9	3	21.15	0.43
Z_Plesovice_4	0.05295	0.00065	0.055	0.00072	0.4057	0.0071	0.13922	106.185	325	28	345.1	4.4	345.8	5.2	973	40	112	3	17.06	0.49
Z_Plesovice_5	0.05345	0.00062	0.05426	0.00073	0.4038	0.007	0.63314	98.4393	346	26	340.6	4.5	344.4	5.1	947	53	99.9	5.4	15.96	0.54
Z_Plesovice_6	0.05326	0.00059	0.05475	0.00073	0.4034	0.007	0.29219	101.357	339	25	343.6	4.4	344.1	5	810	43	91.3	5.2	14.28	0.51
Z_Plesovice_7	0.05335	0.00062	0.05486	0.00072	0.4062	0.0073	0.51354	100.379	343	26	344.3	4.4	346.1	5.3	891	52	93.2	4.9	14.76	0.53
Z_Plesovice_8	0.05325	0.00067	0.05382	0.0007	0.3977	0.0069	0.2391	99.9704	338	29	337.9	4.3	340	5	650	45	61.7	4	9.39	0.42
Z_Plesovice_9	0.05345	0.00074	0.05463	0.00076	0.4032	0.0082	0.62546	99.104	346	31	342.9	4.6	343.9	5.9	789	42	72.5	3.9	12.65	0.33
Z_Plesovice_10	0.05321	0.00063	0.05232	0.0007	0.3832	0.0067	0.59253	97.5371	337	27	328.7	4.3	329.4	4.9	939	62	115.8	9.4	17.2	1.1
Z_Plesovice_11	0.05302	0.00065	0.0545	0.00074	0.3968	0.0073	0.47537	104.299	328	28	342.1	4.5	339.3	5.3	1061	42	128	6.4	19.98	0.61
Z_Plesovice_12	0.05291	0.0006	0.05462	0.00072	0.3931	0.0067	0.39881	105.802	324	26	342.8	4.4	336.6	4.9	1084	71	140	11	20.6	1.1
Z_Plesovice_13	0.0532	0.0007	0.05474	0.00078	0.3946	0.007	0.52408	102.232	336	30	343.5	4.8	337.7	5.1	1153	47	142.1	7.2	23.04	0.75
Z_91500_1	0.07525	0.00089	0.1797	0.0026	1.865	0.038	0.74391	99.1713	1074	24	1065.1	14	1068.6	13	81.9	3.5	31.4	1.6	15.53	0.34
Z_91500_2	0.07475	0.0012	0.1792	0.003	1.843	0.041	0.67442	100.283	1060	31	1063	16	1063	16	76	3.9	28.4	1.3	14.14	0.36
Z_91500_3	0.07397	0.0011	0.1782	0.0027	1.822	0.036	0.33595	101.742	1039	30	1057.1	15	1053.2	13	80.9	3.2	31.7	1.1	15.22	0.33
Z_91500_4	0.07586	0.001	0.1784	0.003	1.851	0.041	0.77031	97.0642	1090	27	1058	17	1066	16	80.3	2.8	30	1.3	15.01	0.25
Z_91500_5	0.07436	0.00096	0.1805	0.0026	1.85	0.035	0.6784	101.876	1050	26	1069.7	14	1063.4	12	79.5	2.8	29.7	1.1	14.99	0.29
Z_91500_6	0.07503	0.00098	0.1785	0.0025	1.837	0.035	0.51512	99.1292	1068	26	1058.7	14	1058.8	13	80.6	4.8	31.6	1.8	15.02	0.54
Z_91500_7	0.0754	0.001	0.1782	0.0029	1.865	0.039	0.69728	98.0798	1078	27	1057.3	16	1068.5	14	80.5	3.6	32.1	1.9	15.02	0.39
Z_91500_8	0.07494	0.00098	0.1789	0.0029	1.851	0.038	0.7173	99.6244	1065	27	1061	16	1063.7	14	78.6	3.9	31.4	1.4	14.92	0.36
Z_91500_9	0.0749	0.001	0.1787	0.0029	1.845	0.039	0.70565	99.1487	1069	26	1059.9	16	1061.5	14	82.4	4.1	32.1	1.8	15.09	0.29
Z_91500_10	0.0746	0.0013	0.1794	0.0029	1.855	0.047	0.68752	100.853	1055	35	1064	16	1065	17	78.7	3.9	26.9	1.4	14.93	0.39
Z_91500_11	0.07421	0.0011	0.1796	0.0028	1.846	0.036	0.30176	101.807	1046	29	1064.9	15	1062.1	13	79.4	4.1	24.9	1.8	14.85	0.46
Z_91500_12	0.07474	0.0011	0.1795	0.0028	1.859	0.038	0.7252	100.406	1060	29	1064.3	15	1066.5	13	80.7	3.1	29.8	1.6	15.12	0.33
Z_91500_13	0.07424	0.0012	0.1787	0.0028	1.845	0.039	0.70274	101.3	1046	31	1059.6	15	1061.5	14	79.9	3.8	29.9	1.6	14.94	0.44
Z_91500_14	0.0753	0.0014	0.1808	0.0029	1.904	0.042	0.45525	99.213	1080	34	1071.5	16	1082	15	79.5	4.6	29.2	1.9	14.97	0.49
Z_91500_15	0.07547	0.00093	0.1793	0.0028	1.878	0.04	0.82708	98.4352	1080	25	1063.1	15	1073	14	80.6	4.3	30	1.5	15.14	0.54
Z_91500_16	0.07471	0.0011	0.1766	0.0029	1.825	0.04	0.51215	99.0085	1059	30	1048.5	16	1054.4	14	79.2	5.6	27	2	14.79	0.64
Z_91500_17	0.07389	0.00092	0.181	0.0028	1.85	0.036	0.69505	103.414	1037	25	1072.4	15	1063.3	13	80	4.9	28.7	1.7	15.04	0.6
Z_91500_18	0.0745	0.00086	0.1769	0.0029	1.836	0.036	0.77122	99.611	1054	23	1049.9	16	1058.4	13	79.9	5.5	30.7	2	15.01	0.59
Z_91500_19	0.07513	0.00096	0.18	0.0027	1.871	0.038	0.75091	99.2651	1075	28	1067.1	14	1070.7	13	80.4	4.3	31.3	2	15.03	0.44
Z_91500_20	0.07531	0.0011	0.1797	0.0028	1.869	0.038	0.66322	98.6204	1080	27	1065.1	15	1070.1	14	80.4	4.6	27.9	1.8	15.04	0.45
Z_91500_21	0.07503	0.001	0.1785	0.0027	1.852	0.038	0.69951	99.1479	1068	27	1058.9	15	1064	14	78.6	5	26.5	2	14.7	0.67
Z_91500_22	0.07477	0.0011	0.1777	0.0032	1.83	0.046	0.86672	99.4345	1061	30	1055	17	1056	16	80.2	4.5	30.9	1.3	15.08	0.49
Z_91500_23	0.07512	0.0012	0.1797	0.0028	1.86	0.042	0.62032	99.5794	1070	31	1065.5	15	1067	15	80.5	2.7	32.1	1	15.02	0.21
Z_91500_24	0.07502	0.00094	0.1798	0.0028	1.848	0.035	0.55645	99.7846	1068	25	1065.7	15	1062.7	13	78.8	4.1	29.3	1.6	14.84	0.47
Z_91500_25	0.075	0.0012	0.1797	0.0029	1.841	0.045	0.57707	99.8313	1067	33	1065.2	16	1060	16	81.4	5.4	30.7	2.3	15.31	0.72
Z_91500_26	0.0755	0.0015	0.1801	0.0029	1.871	0.044	0.42772	98.8333	1080	39	1067.4	16	1071	16	79.2	4.2	28.9	1.5	14.88	0.45
Z_91500_27	0.07516	0.001	0.1773	0.0027	1.818	0.038	0.47873	98.2633	1071	28	1052.4	15	1051.7	14	80.7	4.6	33	1.6	15.15	0.58
Z_91500_28	0.07485	0.0012	0.1806	0.0034	1.833	0.042	0.68555	100.659	1063	31	1070	18	1057	15	79.9	3.9	29.3	1.3	14.98	0.45
* ρ denotes error correlation between 206Pb/238U and 207Pb/235U used to produce concordia diagram
** Signifies rim analyses not included in concordia or age calculations unless otherwise stated
